# Supplementary material for: Photochemical [2 + 2] cycloaddition reaction of carbonyl compounds with Danishefsky diene
Source: Royal Society of Chemistry journal article supplement (doi:10.1039/d0ob00921k), 2020-01-01
Supplement: d0ob00921k1.pdf [file d0ob00921k1.pdf]

## Supporting Information for

# Photochemical [2+2] Cycloaddition Reaction of Carbonyl Compounds with Danishefsky Diene

Dian Agung Pangaribowo<sup>a,b</sup>, Manabu Abe<sup>a,c</sup>

<sup>a</sup>Department of Chemistry, Graduate School of Science, Hiroshima University, Higashi-Hiroshima, Hiroshima 739-8526, Japan

<sup>b</sup>Department of Pharmaceutical Chemistry, Faculty of Pharmacy, University of Jember, Jember, Jawa Timur 68121, Indonesia

<sup>c</sup>Hiroshima Research Center for Photo-Drug-Delivery Ststems (Hi-P-DDS), Hiroshima University, Higashi-Hiroshima, Hiroshima 739-8526, Japan

### Table of contents

|                                                                                                                                             |     |
|---------------------------------------------------------------------------------------------------------------------------------------------|-----|
| 1. Structural determination of <i>cis</i> -5, <i>trans</i> -7, and <i>cis</i> -7.....                                                       | S2  |
| 2. <sup>13</sup> C-NMR spectra and HRMS of all products.....                                                                                | S7  |
| 3. UV-absorption spectrum of <i>trans</i> -1 and 2b.....                                                                                    | S11 |
| 4. Number of photon measurement.....                                                                                                        | S12 |
| 5. Proposed mechanism for the selective formation of <i>cis</i> -5 and <i>cis</i> -7.....                                                   | S14 |
| 6. PES analyses around the dihedral angle ( $\theta^\circ$ ) of diradicals T-DR1- <i>cis</i> and T-DR3- <i>cis</i> ...                      | S15 |
| 7. Potential energy surface analyses of the distance <i>r</i> (pm) of the C (C1 and C4 position of <i>cis</i> -1b) to the O of acetone..... | S15 |
| 8. Radical cation structure of 1 and its charge and spin-density distribution.....                                                          | S16 |
| 9. Cyclic voltammetry (CV) measurement of compound 1.....                                                                                   | S16 |
| 10. Computational data.....                                                                                                                 | S17 |

## Structural determination of *cis-5*, *trans-7*, and *cis-7*

Figure S1 shows the  $^1\text{H}$  NMR spectrum of *cis-5*. In contrast to the large coupling constant in *trans-5*, the protons assigned as  $\text{H}_e$  ( $\delta$  4.4 ppm) and  $\text{H}_f$  ( $\delta$  5.2 ppm) possess a coupling constant of 7.0 Hz, which is a typical value for *cis*-configuration alkene protons. The observation excludes the possibility of the formation of all-*trans* isomer and *cis-6/7*. The H-C HMBC spectrum (Figure S2) shows the correlation of  $\text{H}_e$  with the quaternary carbon connected to phenyl rings  $\text{C}_g$  (97.30 ppm), which verifies the formation of oxetane *cis-5*.

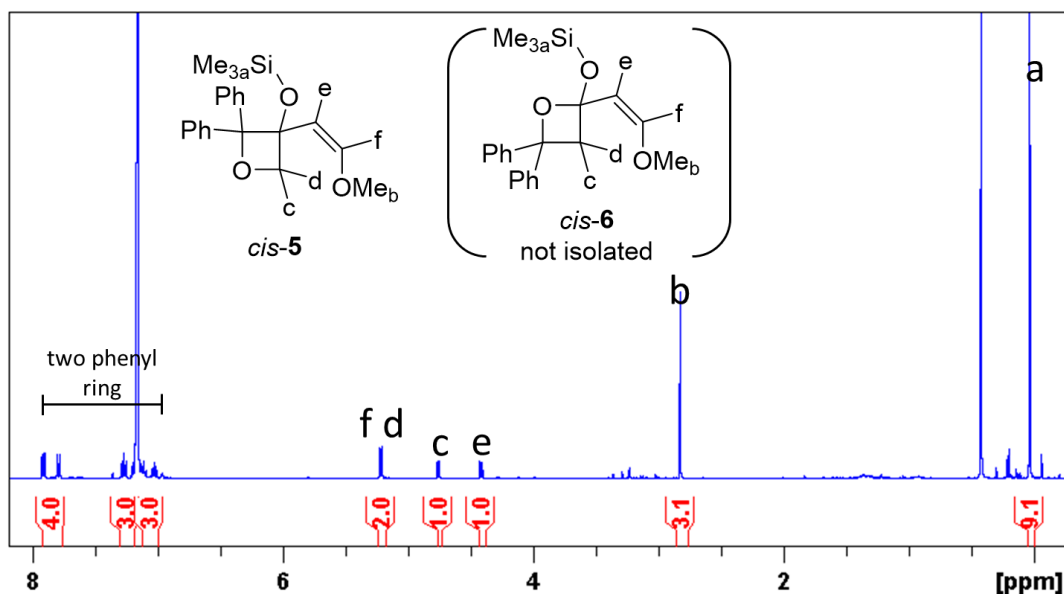

**Figure S1.**  $^1\text{H}$  NMR (400 MHz,  $\text{C}_6\text{D}_6$ ) spectrum of *cis-5*

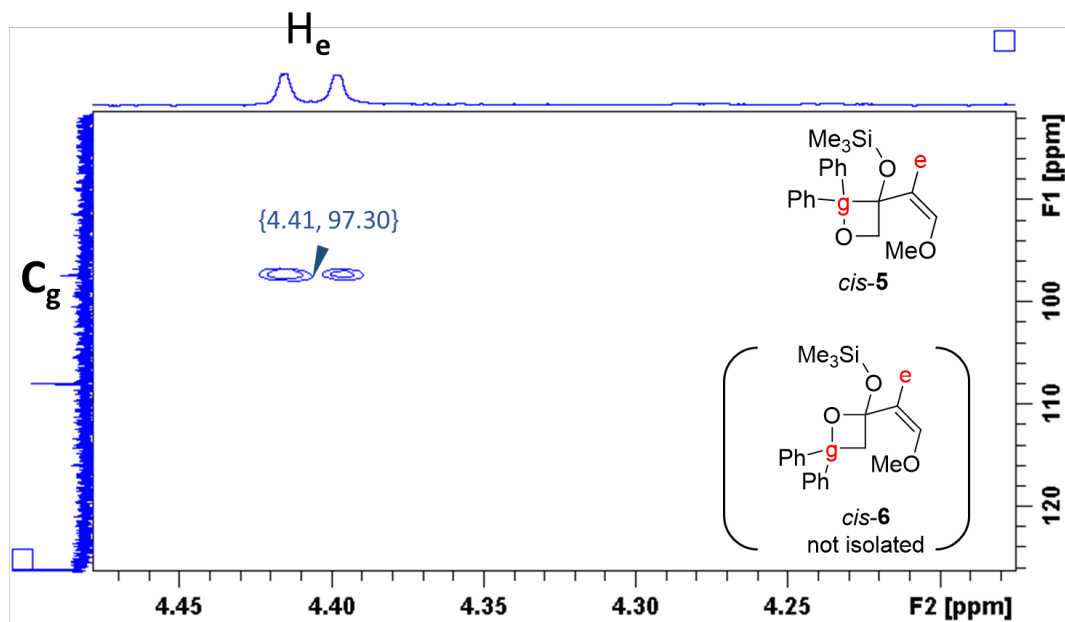

**Figure S2.** H-C HMBC spectrum of *cis-5* (400 MHz, C<sub>6</sub>D<sub>6</sub>)

Figure S3 shows the <sup>1</sup>H NMR spectrum of *trans-7*. Protons assigned as H<sub>c</sub> (δ 3.9 ppm) and H<sub>d</sub> (δ 4.1 ppm) with a very small coupling constant of 1.9 Hz belong to the alkene geminal protons. This assignment excludes the possibility of the formation of **5/6**. Moreover, in the H-C HMBC spectrum (Figure S4), the correlation of H<sub>e</sub> with the quaternary carbon in phenyl rings C<sub>h</sub> (143.13 ppm) and C<sub>i</sub> (147.70 ppm) was observed, thus excludes the possibility of the formation of *cis/trans-8*. The stereochemistry of proton e and f of compound *trans-7* was determined to be *trans* because the correlation of H<sub>d</sub> (δ 4.11) and H<sub>f</sub> (δ 5.79) was observed in the H-H NOESY spectrum, although the correlation of H<sub>e</sub> and H<sub>f</sub> was also observed. (Figure S5).

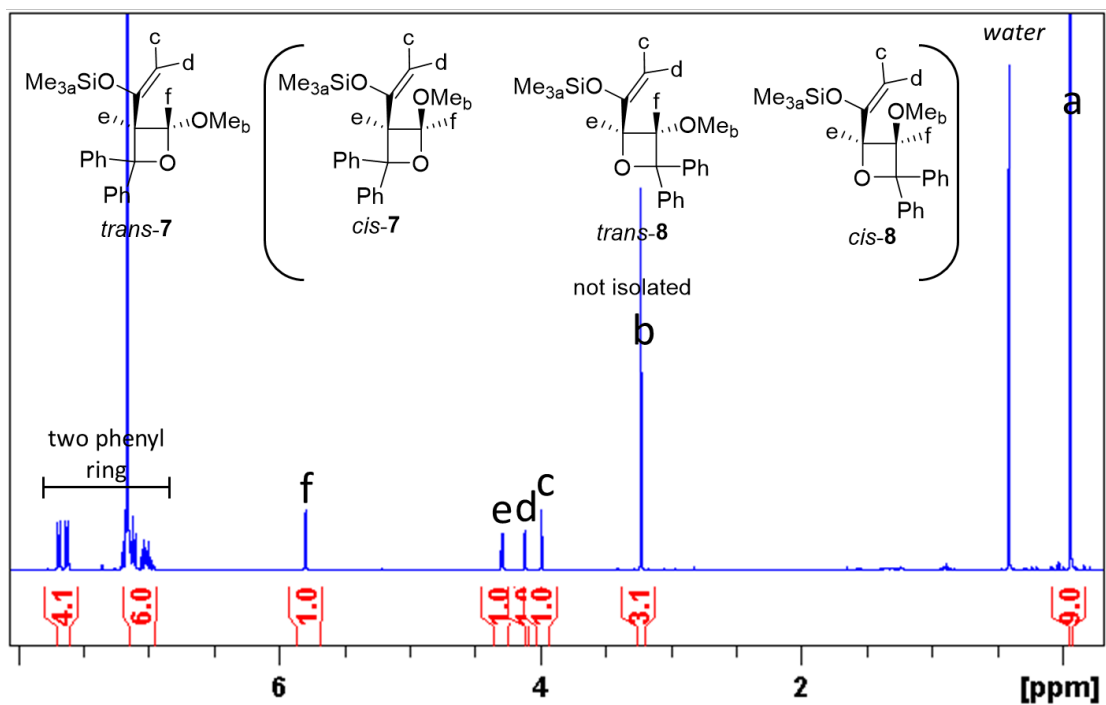

Figure S3.  $^1\text{H}$  NMR (400 MHz,  $\text{C}_6\text{D}_6$ ) spectrum of *trans*-7

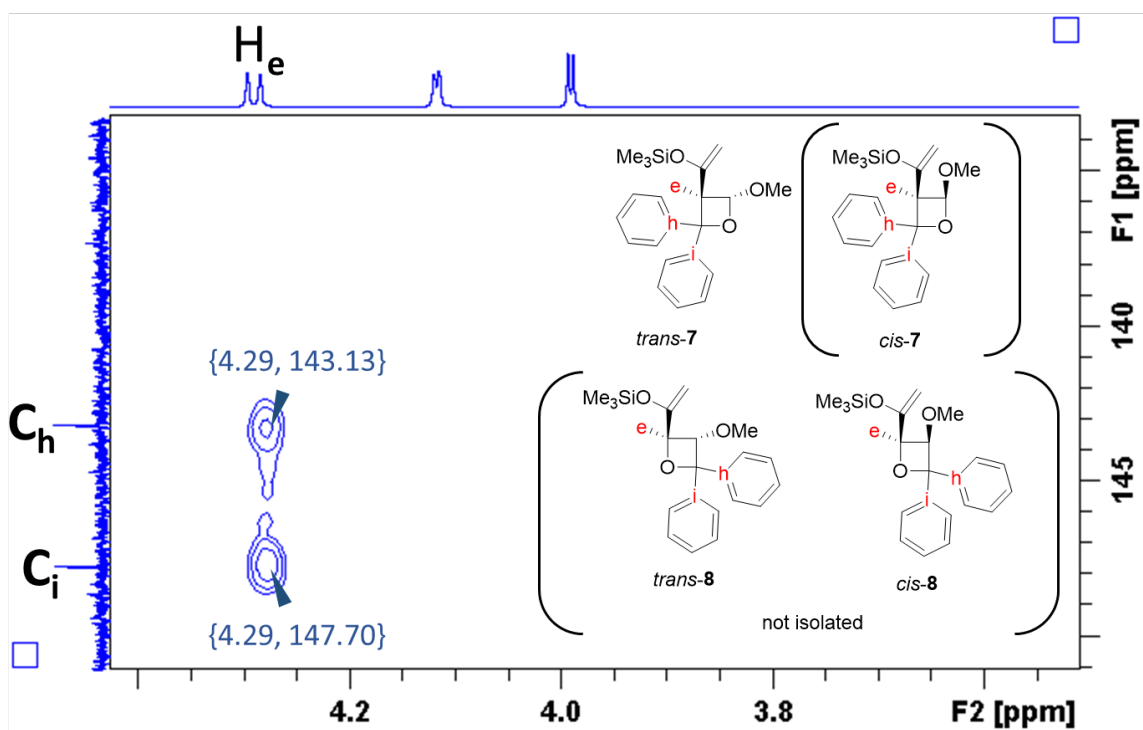

Figure S4. H-C HMBC spectrum of *trans*-7 (400 MHz,  $\text{C}_6\text{D}_6$ )

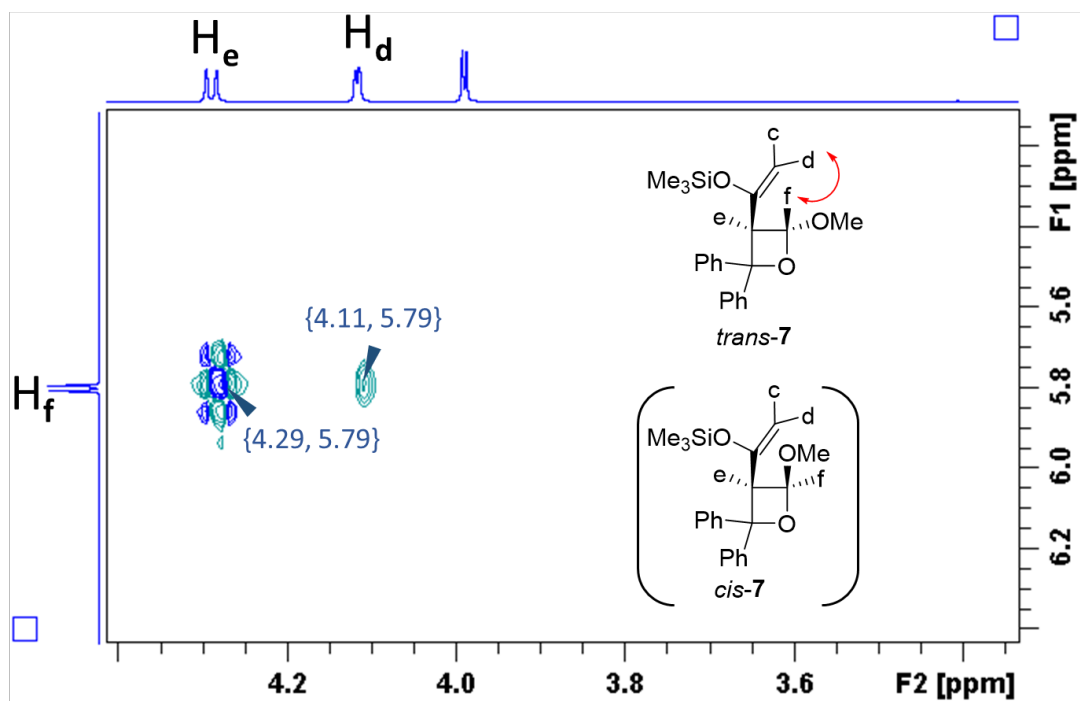

**Figure S5.** H-H NOESY spectrum of *trans*-7 (400 MHz,  $C_6D_6$ )

Figure S6 shows the  $^1H$  NMR spectrum of *cis*-7. Along with the assignment of *trans*-7, proton assigned as  $H_c$  ( $\delta$  4.2 ppm) and  $H_d$  ( $\delta$  4.9 ppm) with coupling constant value 1.1 Hz belong to alkene geminal proton. The observation excludes the possibility of the formation of **5/6**. Furthermore, in the H-C HMBC spectrum (Figure S7), the correlation of  $H_e$  with the quaternary carbons in phenyl rings  $C_h$  (143.22 ppm) and  $C_i$  (147.72 ppm) was observed, thus excludes the possibility of the formation of *cis/trans*-**8**. The stereochemistry of proton e and f of compound *cis*-7 was determined to be *cis* because the correlation of  $H_e$  ( $\delta$  4.28) and  $H_f$  ( $\delta$  5.21) was observed in the H-H NOESY spectrum, but no correlation of  $H_d$  ( $\delta$  4.89) and  $H_f$  ( $\delta$  5.21) was observed. (Figure S8).

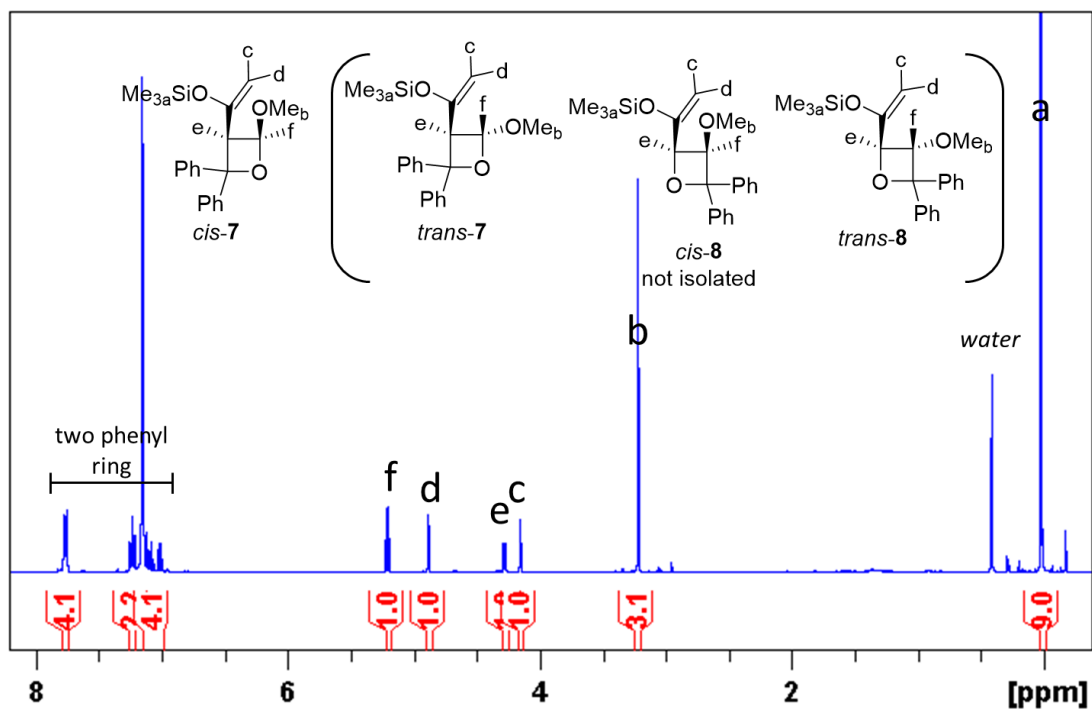

Figure S6.  $^1\text{H}$  NMR (400 MHz,  $\text{C}_6\text{D}_6$ ) spectrum of *cis*-7

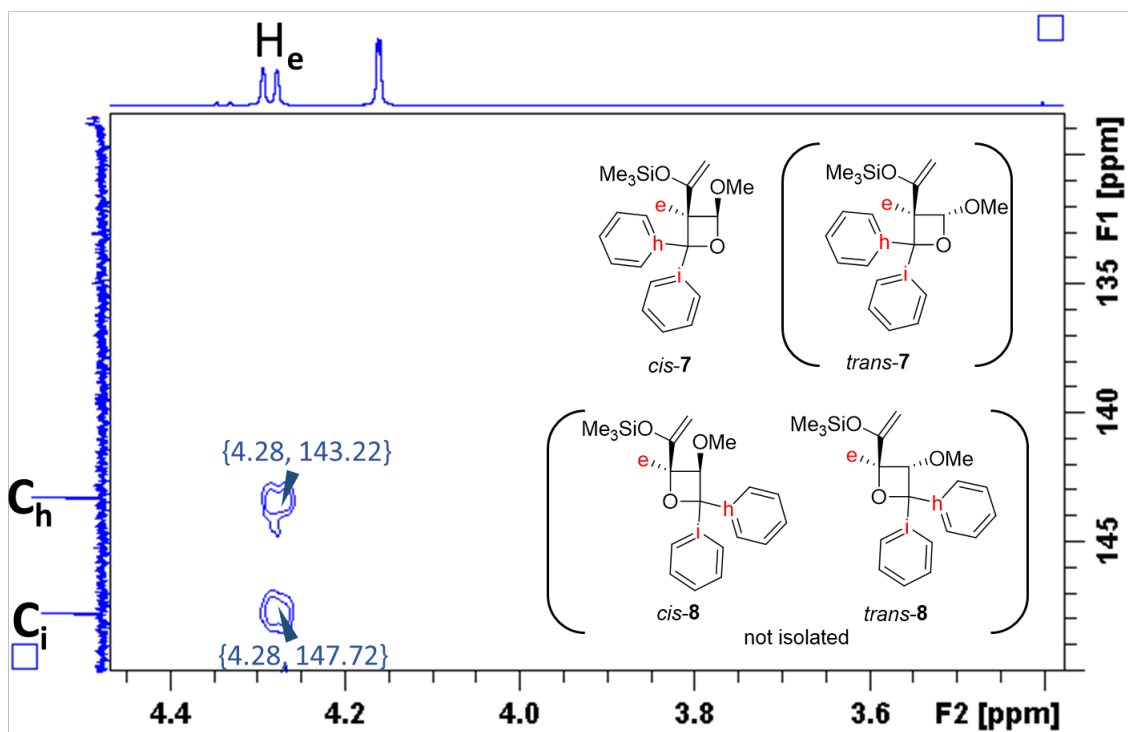

Figure S7. H-C HMBC spectrum of *cis*-7 (400 MHz,  $\text{C}_6\text{D}_6$ )

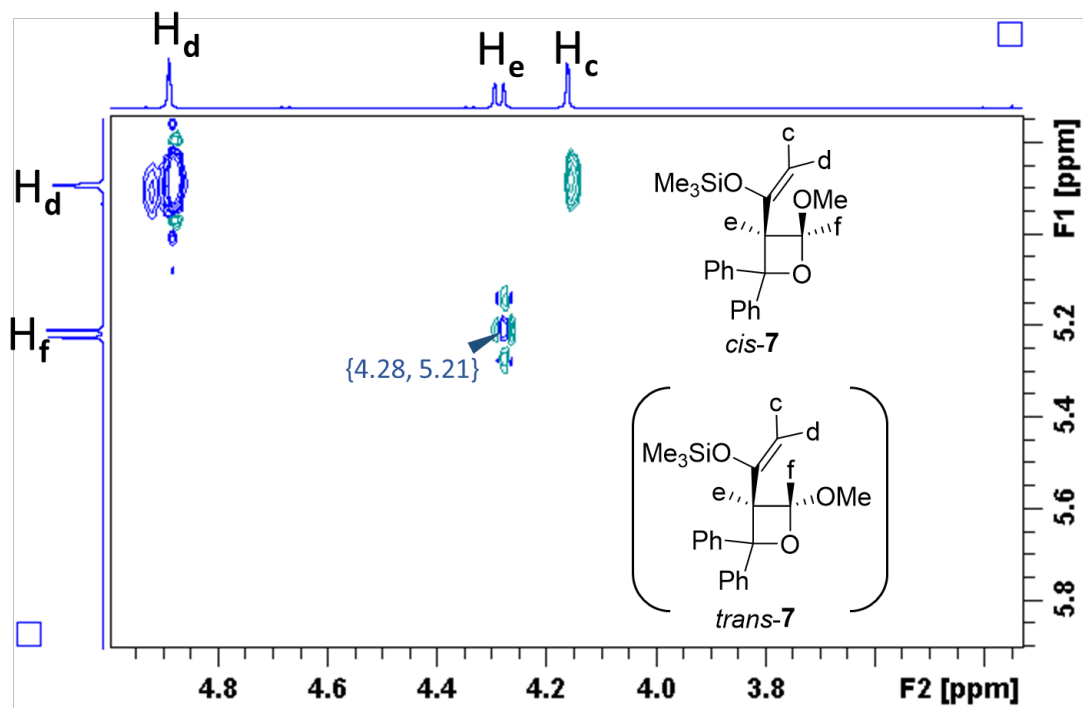

Figure S8. H-H NOESY spectrum of *cis*-7 (400 MHz,  $C_6D_6$ )

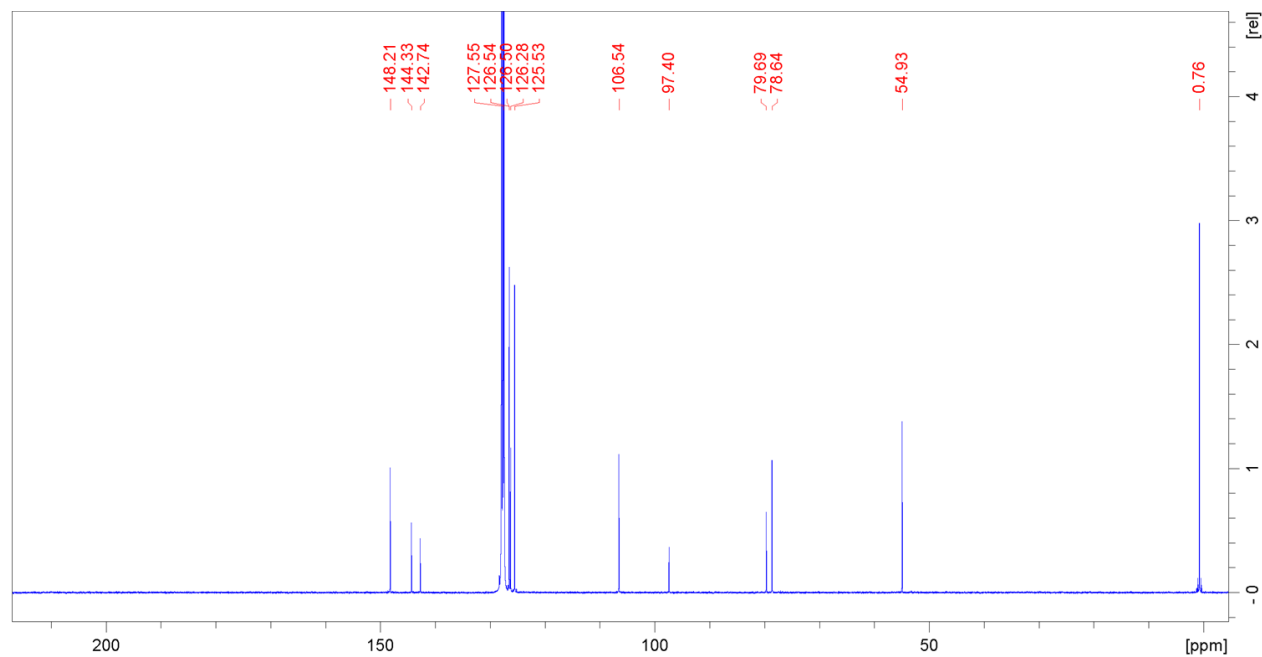

Figure S9.  $^{13}C$  NMR spectrum of *trans*-5 (101 MHz,  $C_6D_6$ )

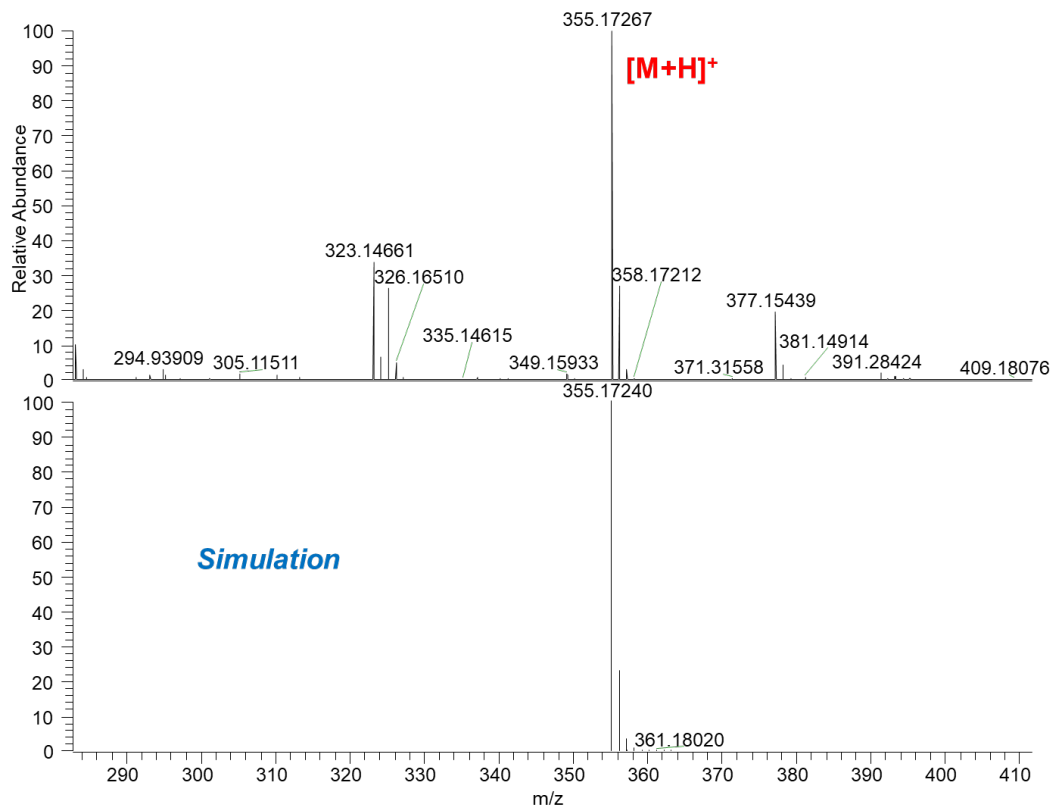

Figure S10. HRMS spectrum of *trans-5*

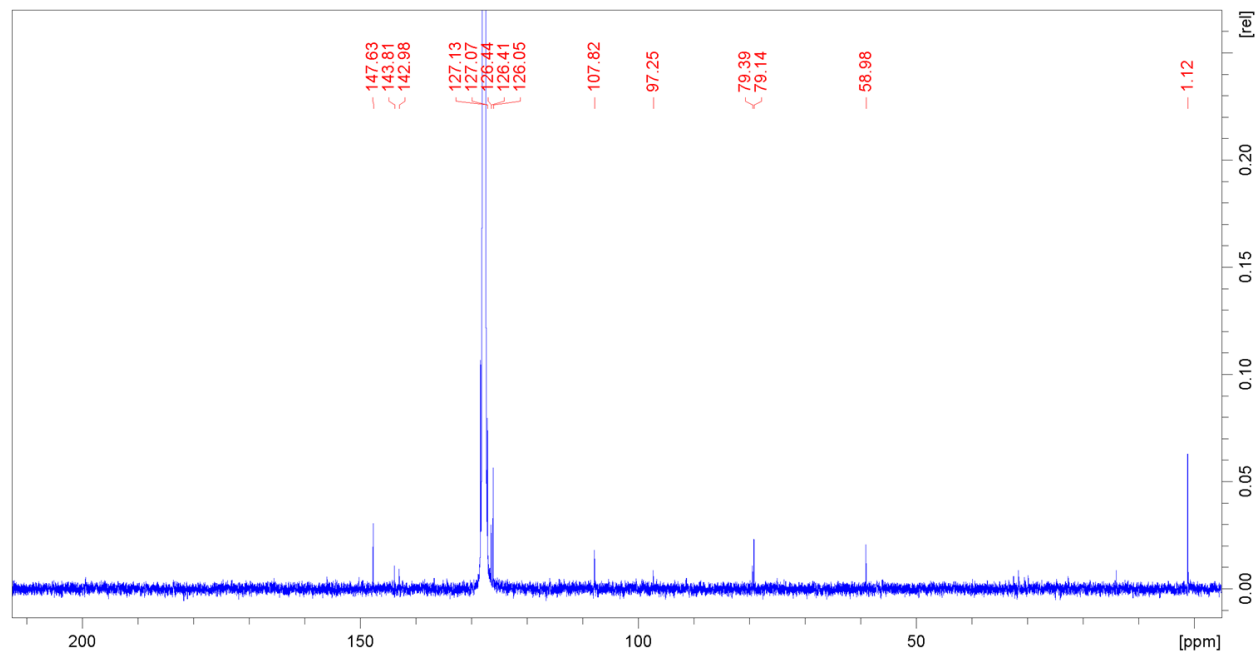

Figure S11.  $^{13}\text{C}$  NMR spectrum of *cis-5* (101 MHz,  $\text{C}_6\text{D}_6$ )



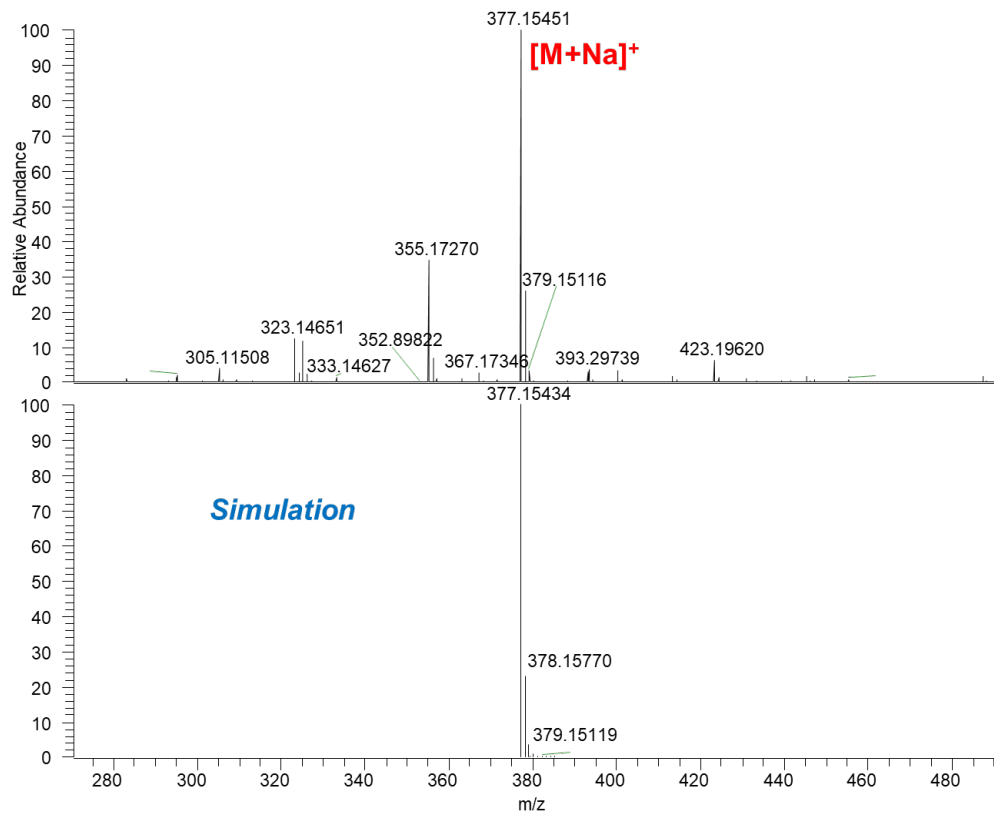

**Figure S12.** HRMS spectrum of *cis-5*

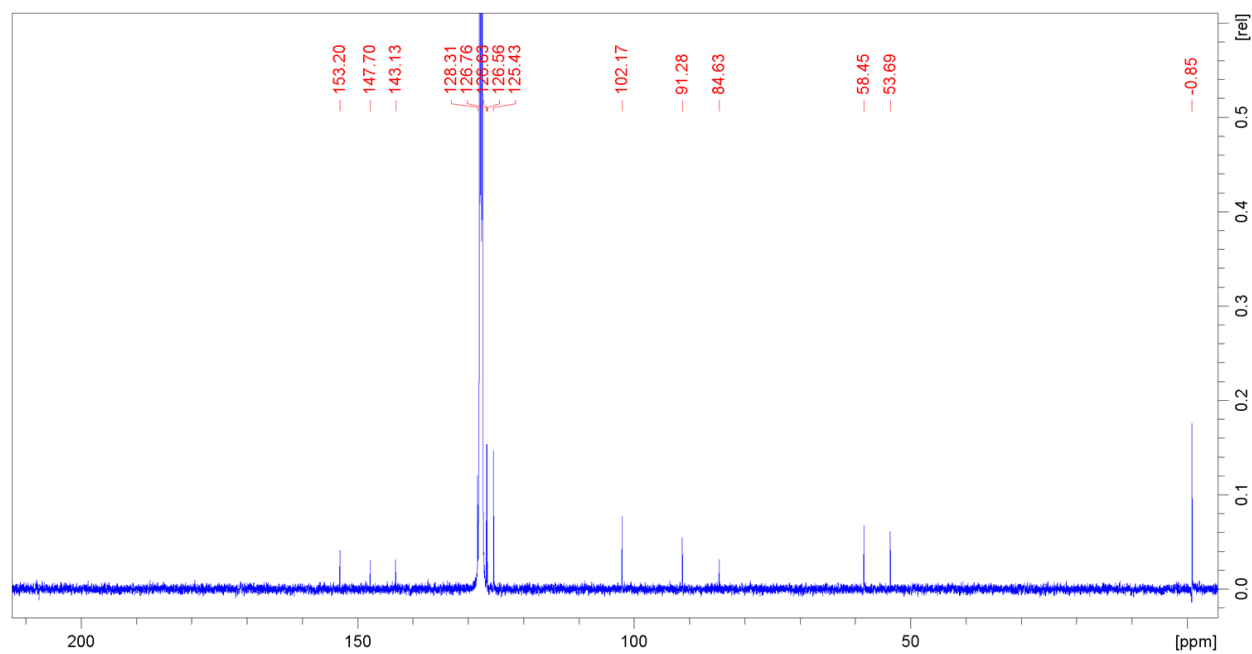

**Figure S13.**  $^{13}C$  NMR spectrum of *trans-7* (101 MHz,  $C_6D_6$ )

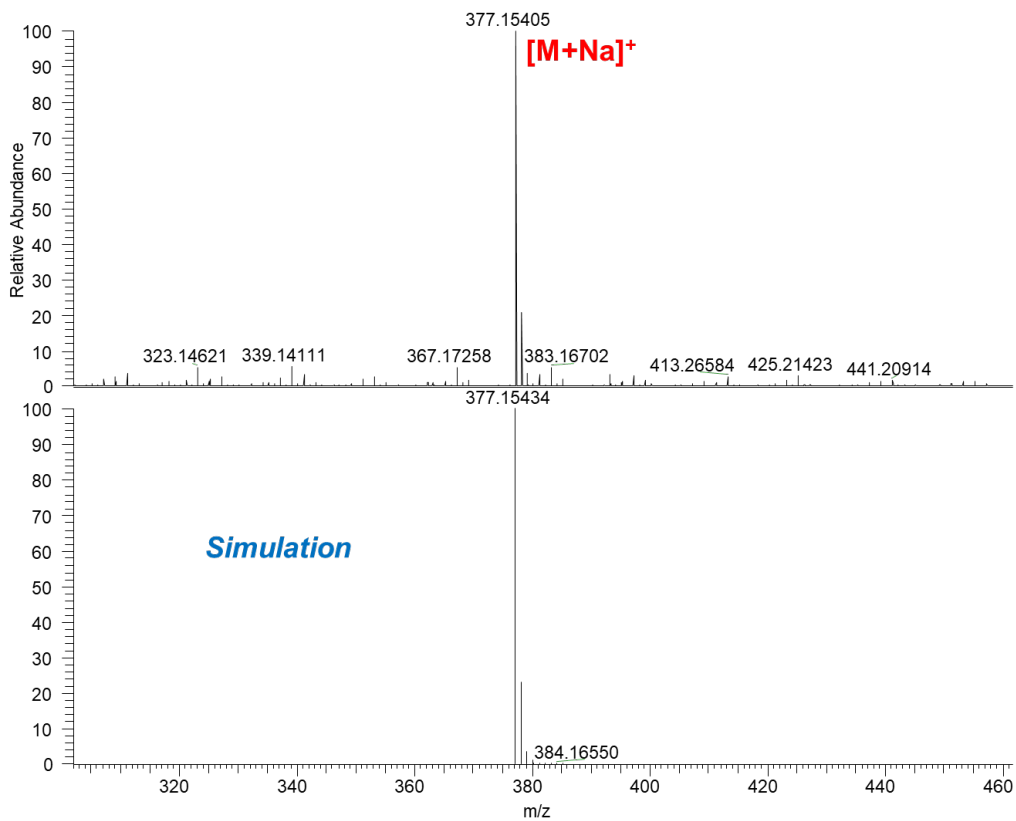

Figure S14. HRMS spectrum of *trans*-7

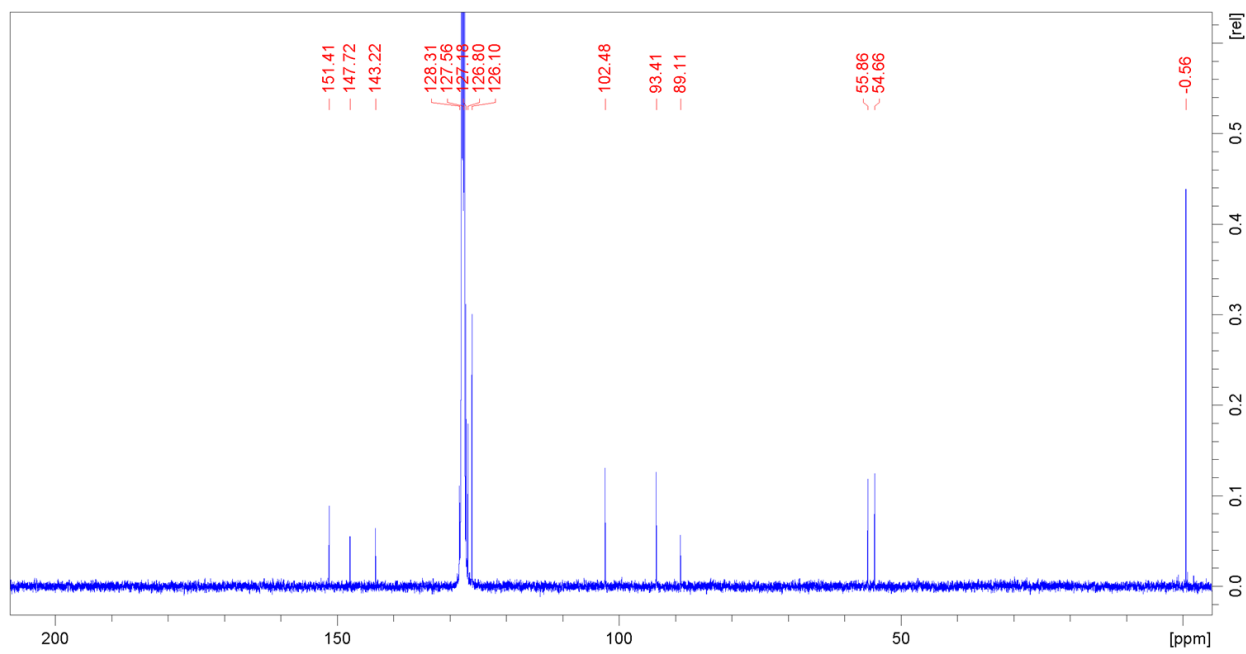

Figure S15.  $^{13}C$  NMR spectrum of *cis*-7 (101 MHz,  $C_6D_6$ )

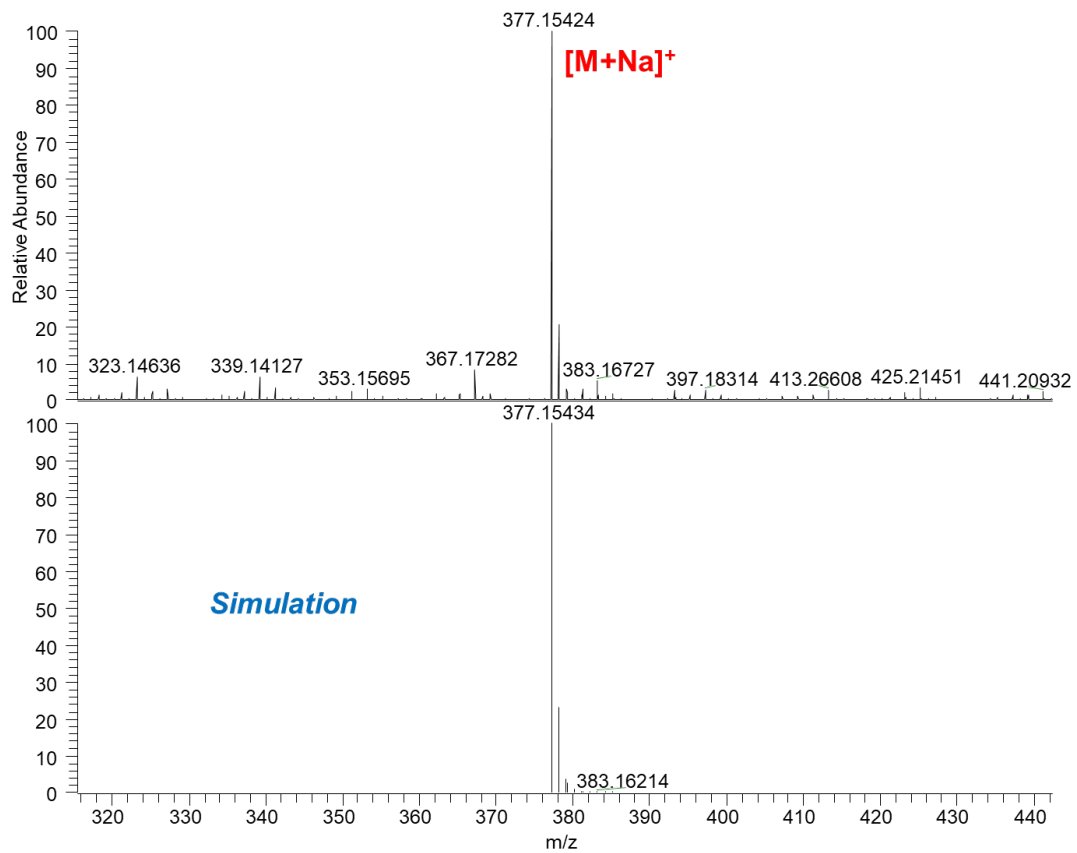

Figure S16. HRMS spectrum of *cis-7*

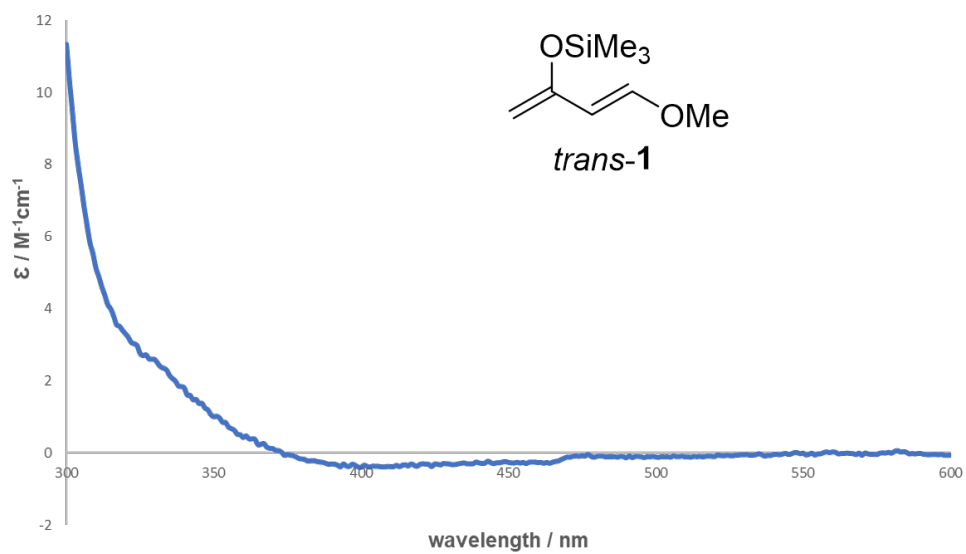

Figure S17. UV spectra of *trans-1*

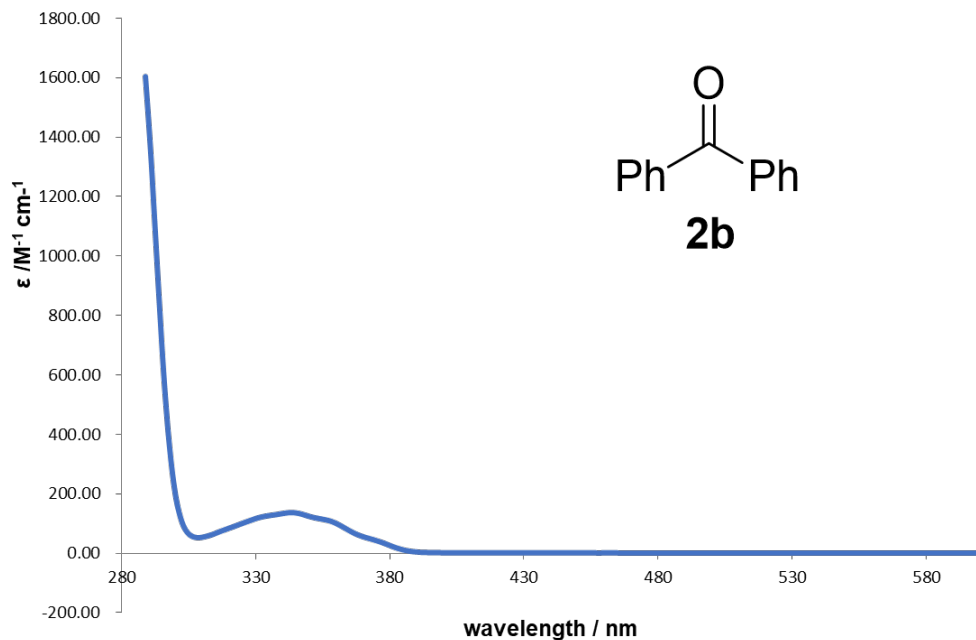

Figure S18. UV spectra of 2b

### Number of photon measurement

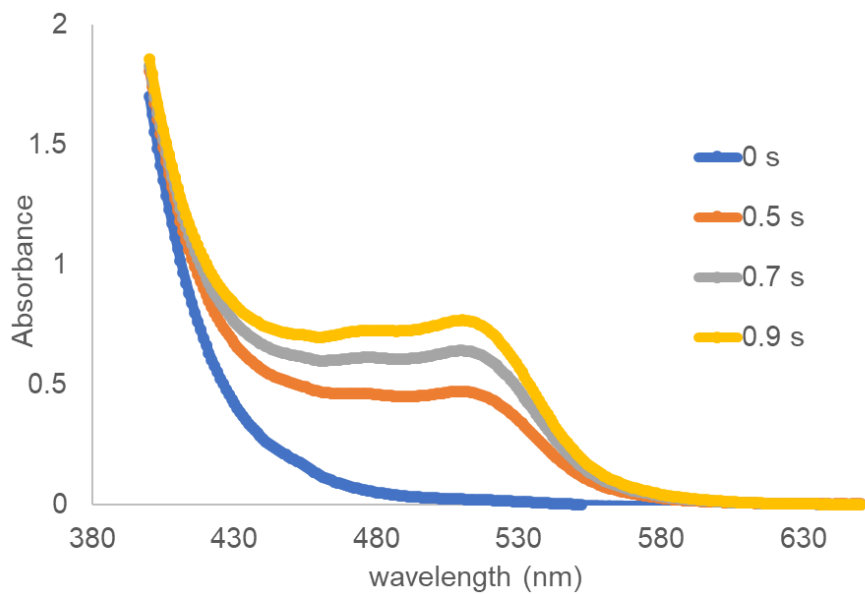

Figure S19. UV spectrum of potassium ferric oxalate solution mixed with phenanthroline after irradiation

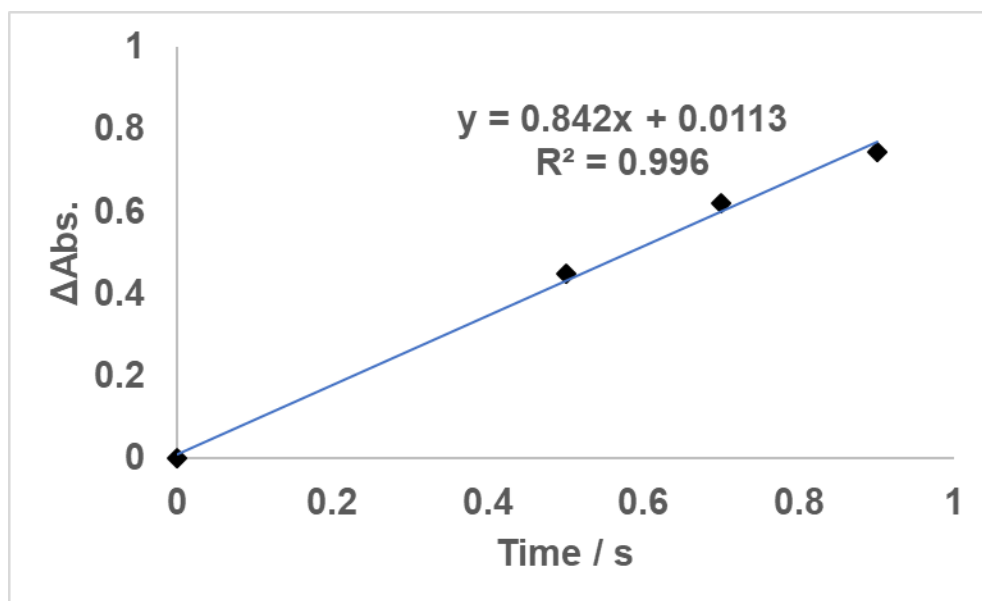

**Figure S20.** The relative plot of absorption and irradiation of potassium ferric oxalate solution mixed with phenanthroline using LED 365 nm lamp

**Table S1.**  $\Delta$  Absorbance value in different time of irradiation

| <b>Time of irradiation<br/>(s)</b> | <b>Absorbance<br/>at 510 nm</b> | <b><math>\Delta</math> Absorbance</b> |
|------------------------------------|---------------------------------|---------------------------------------|
| 0                                  | 0.022511                        | 0                                     |
| 0.5                                | 0.471014                        | 0.448503                              |
| 0.7                                | 0.641684                        | 0.619173                              |
| 0.9                                | 0.768232                        | 0.745721                              |

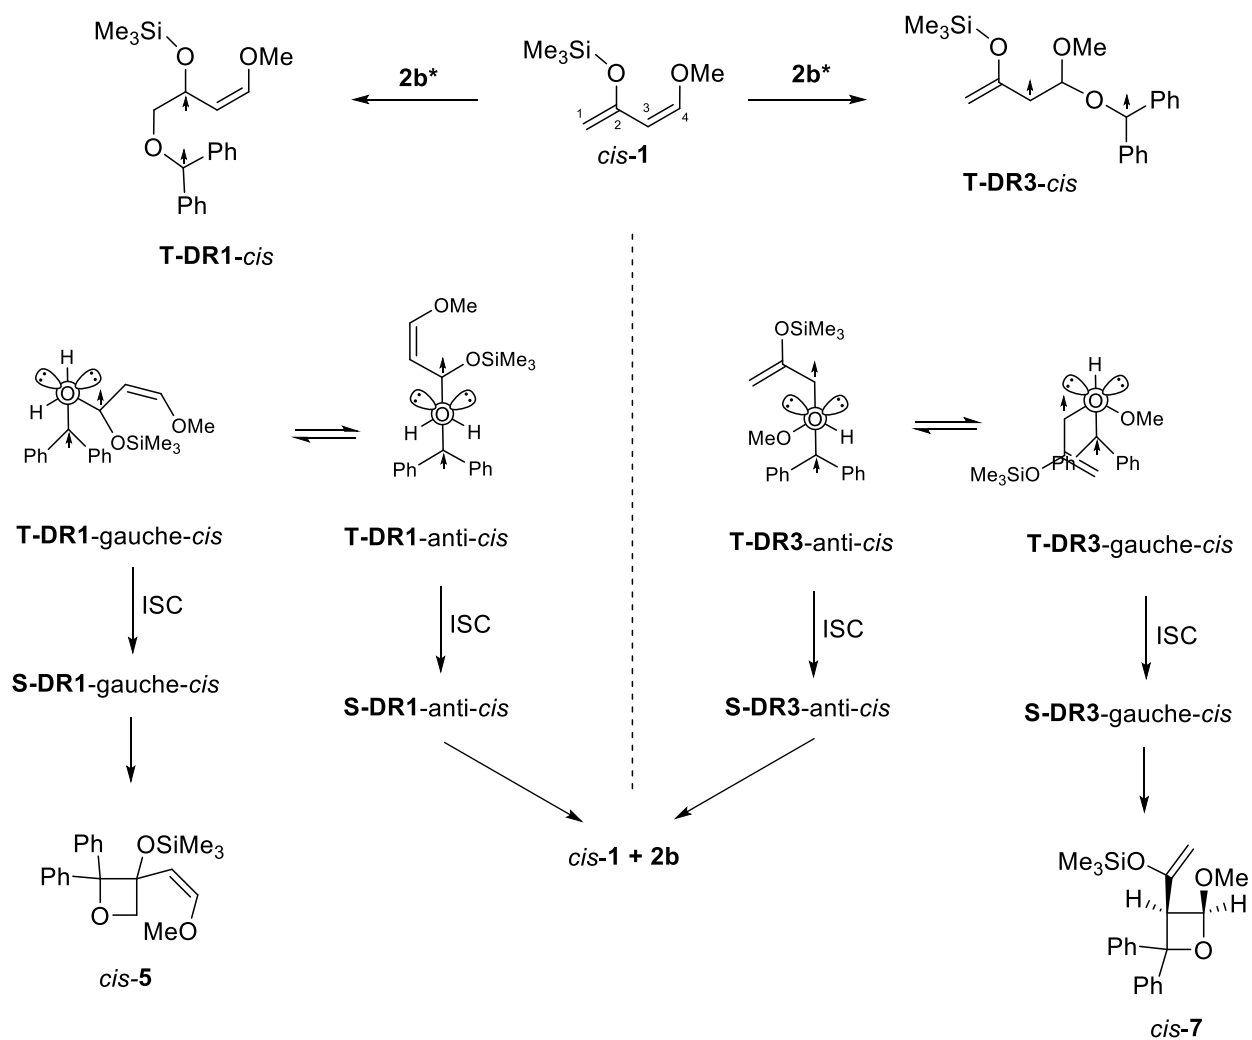

$$5 : 7 = \frac{[\textit{gauche-trans}] + [\textit{gauche-cis}]}{[\textit{gauche-trans}] + [\textit{gauche-cis}] + [\textit{anti}]} : \frac{[\textit{gauche-trans}] + [\textit{gauche-cis}]}{[\textit{gauche-trans}] + [\textit{gauche-cis}] + [\textit{anti}]}$$

**Scheme S1.** Proposed mechanism for the selective formation of *cis*-5 and *cis*-7

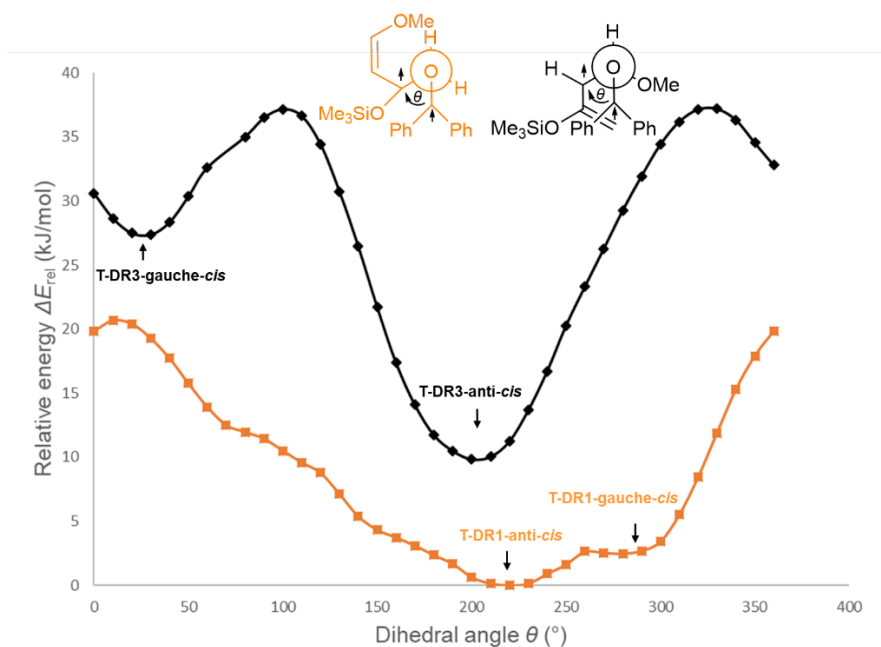

**Figure S21.** PES analyses around the dihedral angle ( $\theta^\circ$ ) of diradicals **T-DR1-*cis*** and **T-DR3-*cis***. The energies,  $\Delta E_{\text{rel}}$  in kJ/mol, were relative to the most stable conformer.

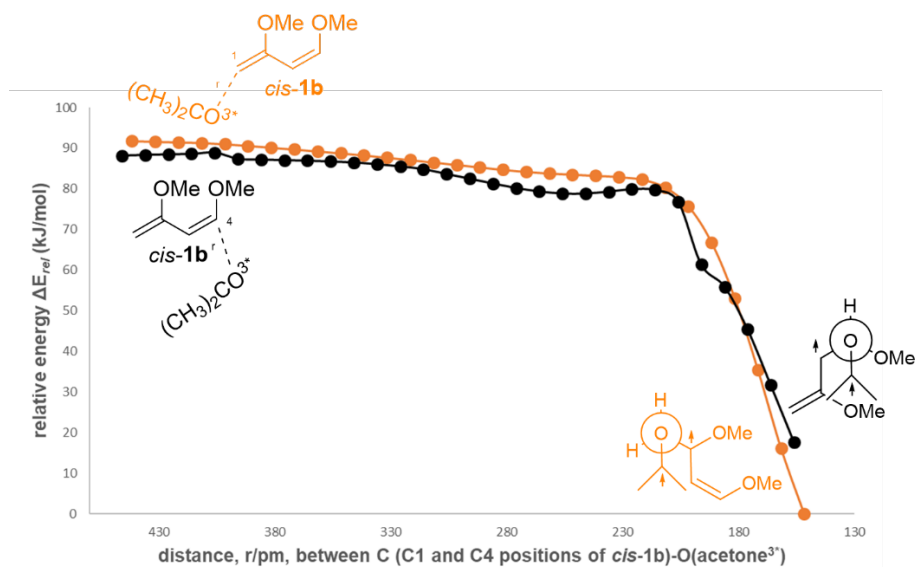

**Figure S22.** The UB3LYP/6-31G(d) potential energy surface analyses of the distance  $r$  (pm) of the C (C1 and C4 position of *cis*-**1b**) to the O of **acetone**. The energies,  $\Delta E_{\text{rel}}$  in kJ/mol, are relative to the most stable diradical.

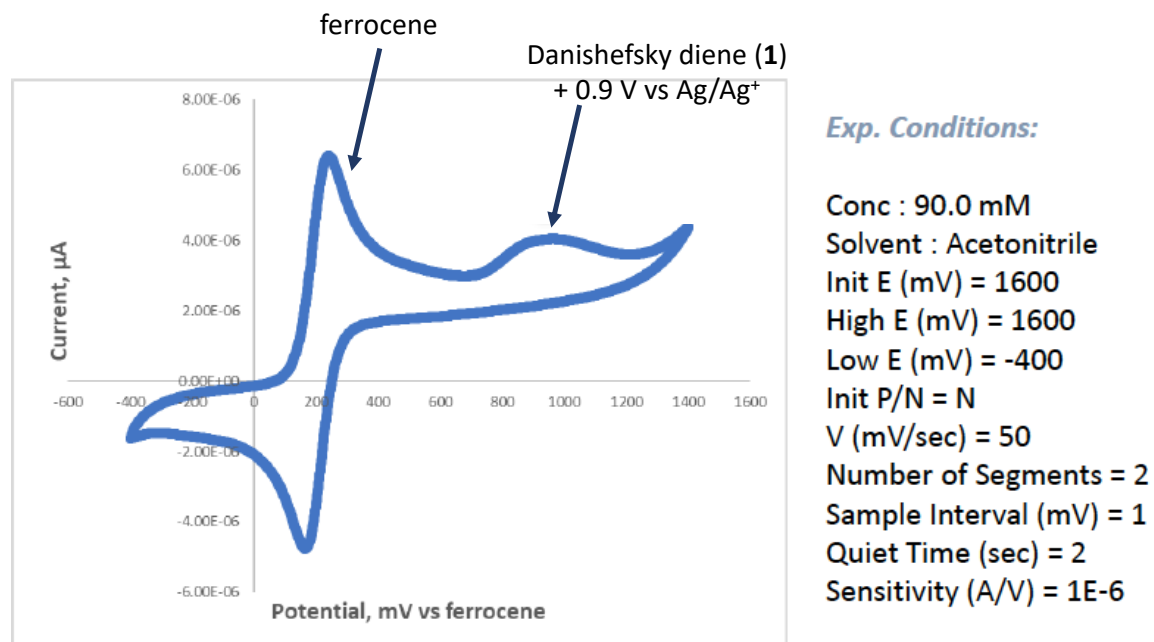

**Figure S23.** Cyclic voltammetry measurement of Danishefski diene (1).

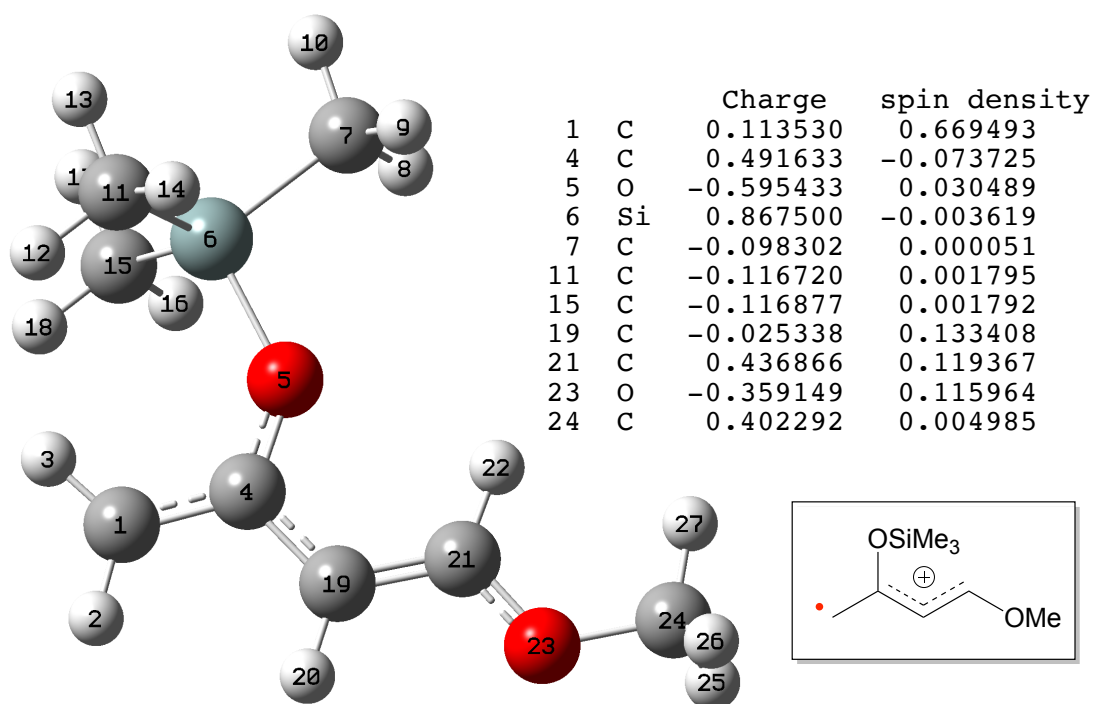

**Figure S24.** Charge and spin-density distribution in the radical cation of 1 at the UB3LYP/6-31G(d) level of theory.



## Computational data

### Structure of optimized structures T-DR1-gauche-trans

Zero-point correction = 0.419254 (Hartree/Particle)  
Thermal correction to Energy = 0.446593  
Thermal correction to Enthalpy = 0.447537  
Thermal correction to Gibbs Free Energy = 0.357594  
Sum of electronic and zero-point Energies = -1330.604995  
Sum of electronic and thermal Energies = -1330.577656  
Sum of electronic and thermal Enthalpies = -1330.576712  
Sum of electronic and thermal Free Energies = -1330.666654

| Center<br>Number | Atomic<br>Number | Atomic<br>Type | Coordinates (Angstroms) |           |           |
|------------------|------------------|----------------|-------------------------|-----------|-----------|
|                  |                  |                | X                       | Y         | Z         |
| 1                | 6                | 0              | 0.479579                | -0.331342 | -1.802880 |
| 2                | 1                | 0              | -0.107521               | -1.251459 | -1.749213 |
| 3                | 1                | 0              | 0.934887                | -0.255922 | -2.794003 |
| 4                | 6                | 0              | 1.530988                | -0.307727 | -0.741006 |
| 5                | 8                | 0              | 1.185497                | -0.812434 | 0.487016  |
| 6                | 14               | 0              | 1.268901                | -2.413093 | 1.038258  |
| 7                | 6                | 0              | 0.473123                | -3.595066 | -0.197943 |
| 8                | 1                | 0              | 0.991276                | -3.586599 | -1.164413 |
| 9                | 1                | 0              | -0.580158               | -3.349974 | -0.375024 |
| 10               | 1                | 0              | 0.515608                | -4.623307 | 0.183607  |
| 11               | 6                | 0              | 0.322116                | -2.388656 | 2.659914  |
| 12               | 1                | 0              | 0.744273                | -1.653320 | 3.354179  |
| 13               | 1                | 0              | 0.351066                | -3.369267 | 3.150606  |
| 14               | 1                | 0              | -0.728174               | -2.126818 | 2.490572  |
| 15               | 6                | 0              | 3.073798                | -2.892536 | 1.302656  |
| 16               | 1                | 0              | 3.546552                | -2.268636 | 2.069875  |
| 17               | 1                | 0              | 3.657236                | -2.782921 | 0.381186  |
| 18               | 1                | 0              | 3.156368                | -3.937764 | 1.626750  |
| 19               | 6                | 0              | 2.739054                | 0.385067  | -0.905701 |
| 20               | 1                | 0              | 2.922211                | 0.781560  | -1.900340 |
| 21               | 6                | 0              | 3.666200                | 0.599857  | 0.092346  |
| 22               | 1                | 0              | 3.503012                | 0.269905  | 1.110621  |
| 23               | 8                | 0              | 4.860254                | 1.235156  | -0.023059 |
| 24               | 6                | 0              | 5.222866                | 1.746418  | -1.296648 |
| 25               | 1                | 0              | 5.282377                | 0.945202  | -2.045336 |
| 26               | 1                | 0              | 6.206594                | 2.202408  | -1.171933 |
| 27               | 1                | 0              | 4.508110                | 2.506240  | -1.639401 |
| 28               | 8                | 0              | -0.421581               | 0.818465  | -1.757508 |
| 29               | 6                | 0              | -1.381351               | 0.862084  | -0.773721 |
| 30               | 6                | 0              | -1.435747               | 2.092206  | -0.026544 |
| 31               | 6                | 0              | -1.502158               | 4.546246  | 1.391770  |
| 32               | 6                | 0              | -2.600016               | 2.510196  | 0.671421  |
| 33               | 6                | 0              | -0.316358               | 2.965847  | -0.010984 |
| 34               | 6                | 0              | -0.353039               | 4.163554  | 0.690154  |
| 35               | 6                | 0              | -2.624412               | 3.710675  | 1.369738  |

|    |   |   |           |           |           |
|----|---|---|-----------|-----------|-----------|
| 36 | 1 | 0 | -3.495076 | 1.898946  | 0.632971  |
| 37 | 1 | 0 | 0.578409  | 2.673392  | -0.547403 |
| 38 | 1 | 0 | 0.523789  | 4.806556  | 0.694607  |
| 39 | 1 | 0 | -3.532241 | 4.006557  | 1.889751  |
| 40 | 1 | 0 | -1.525888 | 5.484509  | 1.939189  |
| 41 | 6 | 0 | -2.325246 | -0.240690 | -0.680608 |
| 42 | 6 | 0 | -4.125772 | -2.423788 | -0.540195 |
| 43 | 6 | 0 | -2.905231 | -0.635301 | 0.549182  |
| 44 | 6 | 0 | -2.669541 | -0.985115 | -1.834965 |
| 45 | 6 | 0 | -3.556083 | -2.054572 | -1.763251 |
| 46 | 6 | 0 | -3.792198 | -1.706012 | 0.612967  |
| 47 | 1 | 0 | -2.630783 | -0.108707 | 1.457499  |
| 48 | 1 | 0 | -2.252614 | -0.687357 | -2.792385 |
| 49 | 1 | 0 | -3.814009 | -2.598145 | -2.668835 |
| 50 | 1 | 0 | -4.218562 | -1.990094 | 1.571866  |
| 51 | 1 | 0 | -4.818152 | -3.259261 | -0.486401 |

-----

**Structure of optimized structures T-DR1-anti-trans**

Zero-point correction = 0.418977 (Hartree/Particle)  
 Thermal correction to Energy = 0.446474  
 Thermal correction to Enthalpy = 0.447418  
 Thermal correction to Gibbs Free Energy = 0.356258  
 Sum of electronic and zero-point Energies = -1330.604447  
 Sum of electronic and thermal Energies = -1330.576950  
 Sum of electronic and thermal Enthalpies = -1330.576006  
 Sum of electronic and thermal Free Energies = -1330.667166

-----

| Center<br>Number | Atomic<br>Number | Atomic<br>Type | Coordinates (Angstroms) |           |           |
|------------------|------------------|----------------|-------------------------|-----------|-----------|
|                  |                  |                | X                       | Y         | Z         |
| 1                | 6                | 0              | 0.616991                | -0.170509 | -0.618333 |
| 2                | 1                | 0              | 0.700163                | -1.248210 | -0.799123 |
| 3                | 1                | 0              | 0.487560                | 0.318253  | -1.591425 |
| 4                | 6                | 0              | 1.912116                | 0.348069  | 0.080540  |
| 5                | 8                | 0              | 3.046588                | 0.015452  | -0.717907 |
| 6                | 14               | 0              | 4.054998                | -1.210894 | -0.164702 |
| 7                | 6                | 0              | 5.482743                | -1.458739 | -1.389652 |
| 8                | 1                | 0              | 6.056417                | -0.533259 | -1.493937 |
| 9                | 1                | 0              | 5.093933                | -1.742481 | -2.371034 |
| 10               | 1                | 0              | 6.153657                | -2.247736 | -1.037029 |
| 11               | 6                | 0              | 3.168769                | -2.863354 | 0.001012  |
| 12               | 1                | 0              | 2.363130                | -2.795728 | 0.737577  |
| 13               | 1                | 0              | 3.865239                | -3.642916 | 0.324655  |
| 14               | 1                | 0              | 2.735836                | -3.163986 | -0.957283 |
| 15               | 6                | 0              | 4.829147                | -0.773258 | 1.501384  |
| 16               | 1                | 0              | 4.053405                | -0.655787 | 2.263632  |
| 17               | 1                | 0              | 5.387437                | 0.164909  | 1.427138  |
| 18               | 1                | 0              | 5.515393                | -1.561465 | 1.823376  |
| 19               | 6                | 0              | 1.764528                | 1.823612  | 0.322625  |
| 20               | 1                | 0              | 0.813418                | 2.111707  | 0.765727  |

|    |   |   |           |           |           |
|----|---|---|-----------|-----------|-----------|
| 21 | 6 | 0 | 2.688419  | 2.748717  | 0.023683  |
| 22 | 1 | 0 | 3.634099  | 2.459681  | -0.409951 |
| 23 | 8 | 0 | 2.640121  | 4.113542  | 0.177360  |
| 24 | 6 | 0 | 1.391455  | 4.613296  | 0.646185  |
| 25 | 1 | 0 | 0.579131  | 4.363632  | -0.044240 |
| 26 | 1 | 0 | 1.466188  | 5.703634  | 0.692116  |
| 27 | 1 | 0 | 1.176508  | 4.252816  | 1.658036  |
| 28 | 8 | 0 | -0.558585 | 0.056764  | 0.189176  |
| 29 | 6 | 0 | -1.813110 | -0.282265 | -0.457813 |
| 30 | 6 | 0 | -2.303389 | -1.635661 | -0.067887 |
| 31 | 6 | 0 | -3.271918 | -4.186548 | 0.583096  |
| 32 | 6 | 0 | -2.974593 | -2.400925 | -1.017146 |
| 33 | 6 | 0 | -2.111827 | -2.159082 | 1.208199  |
| 34 | 6 | 0 | -2.591919 | -3.429429 | 1.538702  |
| 35 | 6 | 0 | -3.461730 | -3.670817 | -0.699298 |
| 36 | 1 | 0 | -3.094158 | -1.972379 | -2.005559 |
| 37 | 1 | 0 | -1.560237 | -1.556983 | 1.921630  |
| 38 | 1 | 0 | -2.417129 | -3.816753 | 2.534991  |
| 39 | 1 | 0 | -3.976634 | -4.246512 | -1.458358 |
| 40 | 1 | 0 | -3.639026 | -5.174396 | 0.833434  |
| 41 | 6 | 0 | -2.783286 | 0.835986  | -0.295555 |
| 42 | 6 | 0 | -4.617329 | 2.943268  | -0.085988 |
| 43 | 6 | 0 | -3.327157 | 1.411722  | -1.439143 |
| 44 | 6 | 0 | -3.151687 | 1.327192  | 0.953692  |
| 45 | 6 | 0 | -4.067794 | 2.375681  | 1.065248  |
| 46 | 6 | 0 | -4.243868 | 2.461543  | -1.341109 |
| 47 | 1 | 0 | -3.000033 | 1.020619  | -2.394341 |
| 48 | 1 | 0 | -2.691210 | 0.875911  | 1.825231  |
| 49 | 1 | 0 | -4.333928 | 2.744198  | 2.048107  |
| 50 | 1 | 0 | -4.648068 | 2.897241  | -2.246354 |
| 51 | 1 | 0 | -5.323411 | 3.761446  | -0.004882 |

-----

**Structure of optimized structures T-DR3-gauche-trans**

Zero-point correction = 0.417613 (Hartree/Particle)  
 Thermal correction to Energy = 0.444952  
 Thermal correction to Enthalpy = 0.445896  
 Thermal correction to Gibbs Free Energy = 0.356960  
 Sum of electronic and zero-point Energies = -1330.595152  
 Sum of electronic and thermal Energies = -1330.567813  
 Sum of electronic and thermal Enthalpies = -1330.566869  
 Sum of electronic and thermal Free Energies = -1330.655805

-----

| Center<br>Number | Atomic<br>Number | Atomic<br>Type | Coordinates (Angstroms) |           |           |
|------------------|------------------|----------------|-------------------------|-----------|-----------|
|                  |                  |                | X                       | Y         | Z         |
| 1                | 6                | 0              | -2.068025               | -1.570366 | -0.179916 |
| 2                | 8                | 0              | -2.905597               | -1.070245 | 0.793230  |
| 3                | 14               | 0              | -4.232692               | -0.042772 | 0.574425  |
| 4                | 6                | 0              | -5.684572               | -0.997498 | -0.161553 |
| 5                | 1                | 0              | -5.452438               | -1.385053 | -1.160267 |

|    |   |   |           |           |           |
|----|---|---|-----------|-----------|-----------|
| 6  | 1 | 0 | -6.566680 | -0.351575 | -0.256374 |
| 7  | 1 | 0 | -5.962800 | -1.847659 | 0.472389  |
| 8  | 6 | 0 | -3.754056 | 1.384006  | -0.559798 |
| 9  | 1 | 0 | -3.492881 | 1.028552  | -1.563528 |
| 10 | 1 | 0 | -2.893630 | 1.938675  | -0.168501 |
| 11 | 1 | 0 | -4.588365 | 2.088485  | -0.667061 |
| 12 | 8 | 0 | 1.122910  | -0.266013 | -1.582244 |
| 13 | 6 | 0 | 1.796491  | 0.421904  | -0.595270 |
| 14 | 6 | 0 | 2.933615  | -0.239972 | 0.033382  |
| 15 | 6 | 0 | 5.153199  | -1.550743 | 1.196744  |
| 16 | 6 | 0 | 3.329512  | 0.033163  | 1.363600  |
| 17 | 6 | 0 | 3.671650  | -1.207418 | -0.688680 |
| 18 | 6 | 0 | 4.765993  | -1.844201 | -0.115313 |
| 19 | 6 | 0 | 4.423263  | -0.614139 | 1.932904  |
| 20 | 1 | 0 | 2.750773  | 0.730345  | 1.961026  |
| 21 | 1 | 0 | 3.369106  | -1.442801 | -1.702178 |
| 22 | 1 | 0 | 5.325265  | -2.573175 | -0.696287 |
| 23 | 1 | 0 | 4.699107  | -0.394446 | 2.961143  |
| 24 | 1 | 0 | 6.007880  | -2.052633 | 1.641977  |
| 25 | 6 | 0 | 1.437101  | 1.811408  | -0.456161 |
| 26 | 6 | 0 | 0.683696  | 4.542398  | -0.240532 |
| 27 | 6 | 0 | 2.263391  | 2.758885  | 0.207693  |
| 28 | 6 | 0 | 0.238818  | 2.300614  | -1.045182 |
| 29 | 6 | 0 | -0.127739 | 3.635006  | -0.931547 |
| 30 | 6 | 0 | 1.884856  | 4.090906  | 0.316874  |
| 31 | 1 | 0 | 3.221295  | 2.447844  | 0.607614  |
| 32 | 1 | 0 | -0.390228 | 1.611878  | -1.596140 |
| 33 | 1 | 0 | -1.053185 | 3.974019  | -1.390610 |
| 34 | 1 | 0 | 2.542049  | 4.789523  | 0.828663  |
| 35 | 1 | 0 | 0.393161  | 5.585467  | -0.152268 |
| 36 | 8 | 0 | 0.910743  | -2.567861 | -1.003430 |
| 37 | 6 | 0 | 1.000490  | -3.010442 | 0.352493  |
| 38 | 1 | 0 | 1.377680  | -2.233990 | 1.025070  |
| 39 | 1 | 0 | 1.712632  | -3.838563 | 0.338722  |
| 40 | 1 | 0 | 0.031945  | -3.370695 | 0.716963  |
| 41 | 6 | 0 | -2.482666 | -2.658838 | -0.931037 |
| 42 | 1 | 0 | -3.455653 | -3.105843 | -0.766390 |
| 43 | 1 | 0 | -1.824441 | -3.116936 | -1.659517 |
| 44 | 6 | 0 | 0.229408  | -1.369506 | -1.289887 |
| 45 | 1 | 0 | -0.216259 | -1.537418 | -2.274258 |
| 46 | 6 | 0 | -0.813766 | -0.961505 | -0.289496 |
| 47 | 1 | 0 | -0.574438 | -0.157926 | 0.398164  |
| 48 | 6 | 0 | -4.639284 | 0.550439  | 2.309751  |
| 49 | 1 | 0 | -5.523529 | 1.199336  | 2.309983  |
| 50 | 1 | 0 | -4.845385 | -0.295677 | 2.975210  |
| 51 | 1 | 0 | -3.805973 | 1.117418  | 2.739635  |

---

## Structure of optimized structures T-DR3-anti-trans

Zero-point correction = 0.417152 (Hartree/Particle)  
Thermal correction to Energy = 0.444841  
Thermal correction to Enthalpy = 0.445785  
Thermal correction to Gibbs Free Energy = 0.353250  
Sum of electronic and zero-point Energies = -1330.603665  
Sum of electronic and thermal Energies = -1330.575976  
Sum of electronic and thermal Enthalpies = -1330.575032  
Sum of electronic and thermal Free Energies = -1330.667567

| Center<br>Number | Atomic<br>Number | Atomic<br>Type | Coordinates (Angstroms) |           |           |
|------------------|------------------|----------------|-------------------------|-----------|-----------|
|                  |                  |                | X                       | Y         | Z         |
| 1                | 6                | 0              | 2.440748                | 0.658473  | -0.672026 |
| 2                | 8                | 0              | 3.765283                | 0.544850  | -1.072796 |
| 3                | 14               | 0              | 4.896773                | -0.184073 | -0.090756 |
| 4                | 6                | 0              | 5.049473                | -2.037851 | -0.326874 |
| 5                | 1                | 0              | 4.128014                | -2.544194 | -0.023610 |
| 6                | 1                | 0              | 5.872396                | -2.437275 | 0.274330  |
| 7                | 1                | 0              | 5.243373                | -2.277624 | -1.375684 |
| 8                | 6                | 0              | 4.755708                | 0.271990  | 1.728924  |
| 9                | 1                | 0              | 3.818142                | -0.101766 | 2.149364  |
| 10               | 1                | 0              | 4.781501                | 1.358396  | 1.855252  |
| 11               | 1                | 0              | 5.582617                | -0.159965 | 2.299356  |
| 12               | 8                | 0              | -0.755090               | -0.365399 | -0.248326 |
| 13               | 6                | 0              | -2.026994               | -0.021849 | 0.386856  |
| 14               | 6                | 0              | -2.330947               | 1.428599  | 0.246865  |
| 15               | 6                | 0              | -2.917446               | 4.163689  | 0.079785  |
| 16               | 6                | 0              | -2.713246               | 2.137706  | 1.380472  |
| 17               | 6                | 0              | -2.235060               | 2.096277  | -0.969919 |
| 18               | 6                | 0              | -2.525514               | 3.460199  | -1.060039 |
| 19               | 6                | 0              | -3.008963               | 3.500359  | 1.304693  |
| 20               | 1                | 0              | -2.749127               | 1.592252  | 2.316674  |
| 21               | 1                | 0              | -1.893801               | 1.529820  | -1.829636 |
| 22               | 1                | 0              | -2.420484               | 3.960933  | -2.014427 |
| 23               | 1                | 0              | -3.289902               | 4.032153  | 2.205164  |
| 24               | 1                | 0              | -3.128016               | 5.223814  | 0.017682  |
| 25               | 6                | 0              | -3.104063               | -0.964035 | -0.019505 |
| 26               | 6                | 0              | -5.158647               | -2.746499 | -0.691423 |
| 27               | 6                | 0              | -3.906887               | -1.519085 | 0.970745  |
| 28               | 6                | 0              | -3.325892               | -1.313857 | -1.347835 |
| 29               | 6                | 0              | -4.349653               | -2.201268 | -1.689830 |
| 30               | 6                | 0              | -4.935195               | -2.407116 | 0.643343  |
| 31               | 1                | 0              | -3.688381               | -1.242560 | 1.996426  |
| 32               | 1                | 0              | -2.664590               | -0.891600 | -2.095886 |
| 33               | 1                | 0              | -4.493035               | -2.465874 | -2.730047 |
| 34               | 1                | 0              | -5.539688               | -2.830608 | 1.435351  |
| 35               | 1                | 0              | -5.947310               | -3.442180 | -0.950809 |
| 36               | 8                | 0              | 0.481354                | -1.578650 | 1.483666  |
| 37               | 6                | 0              | 0.228866                | -2.790965 | 0.805663  |

|    |   |   |           |           |           |
|----|---|---|-----------|-----------|-----------|
| 38 | 1 | 0 | -0.743538 | -2.789787 | 0.307914  |
| 39 | 1 | 0 | 0.213385  | -3.592988 | 1.550864  |
| 40 | 1 | 0 | 1.019341  | -3.030153 | 0.089498  |
| 41 | 6 | 0 | 1.832442  | 1.839849  | -0.795313 |
| 42 | 1 | 0 | 2.382956  | 2.702229  | -1.134869 |
| 43 | 1 | 0 | 0.779614  | 1.936290  | -0.561031 |
| 44 | 6 | 0 | 0.444125  | -0.452278 | 0.587596  |
| 45 | 1 | 0 | 0.487962  | 0.442846  | 1.216943  |
| 46 | 6 | 0 | 1.714200  | -0.581676 | -0.285756 |
| 47 | 1 | 0 | 1.381473  | -1.084895 | -1.206983 |
| 48 | 6 | 0 | 6.650060  | 0.487654  | -0.578984 |
| 49 | 1 | 0 | 7.396331  | -0.000052 | 0.012728  |
| 50 | 1 | 0 | 6.831572  | 0.290986  | -1.614974 |
| 51 | 1 | 0 | 6.689297  | 1.542517  | -0.403985 |

Structure of optimized structures T-DRI-gauche-cis

Zero-point correction = 0.418613 (Hartree/Particle)  
 Thermal correction to Energy = 0.446261  
 Thermal correction to Enthalpy = 0.447205  
 Thermal correction to Gibbs Free Energy = 0.356120  
 Sum of electronic and zero-point Energies = -1330.603339  
 Sum of electronic and thermal Energies = -1330.575691  
 Sum of electronic and thermal Enthalpies = -1330.574747  
 Sum of electronic and thermal Free Energies = -1330.665832

| Center<br>Number | Atomic<br>Number | Atomic<br>Type | Coordinates (Angstroms) |           |           |
|------------------|------------------|----------------|-------------------------|-----------|-----------|
|                  |                  |                | X                       | Y         | Z         |
| 1                | 6                | 0              | 0.109654                | -0.563440 | -1.996549 |
| 2                | 1                | 0              | -0.347148               | -1.488802 | -1.632188 |
| 3                | 1                | 0              | 0.298963                | -0.655840 | -3.068976 |
| 4                | 6                | 0              | 1.383128                | -0.274554 | -1.259814 |
| 5                | 8                | 0              | 1.362403                | -0.497651 | 0.084301  |
| 6                | 14               | 0              | 1.796105                | -1.863835 | 0.985357  |
| 7                | 6                | 0              | 1.964261                | -1.214836 | 2.740219  |
| 8                | 1                | 0              | 1.027631                | -0.757202 | 3.078226  |
| 9                | 1                | 0              | 2.747246                | -0.450817 | 2.796055  |
| 10               | 1                | 0              | 2.218949                | -2.017908 | 3.442495  |
| 11               | 6                | 0              | 3.409831                | -2.593486 | 0.341475  |
| 12               | 1                | 0              | 3.315654                | -2.915514 | -0.702486 |
| 13               | 1                | 0              | 3.702111                | -3.470728 | 0.932327  |
| 14               | 1                | 0              | 4.215738                | -1.855323 | 0.391371  |
| 15               | 6                | 0              | 0.432408                | -3.163981 | 0.879996  |
| 16               | 1                | 0              | 0.324172                | -3.558497 | -0.137708 |
| 17               | 1                | 0              | -0.540178               | -2.760205 | 1.182547  |
| 18               | 1                | 0              | 0.662101                | -4.014979 | 1.534520  |
| 19               | 6                | 0              | 2.455710                | 0.355716  | -1.891123 |

|    |   |   |           |           |           |
|----|---|---|-----------|-----------|-----------|
| 20 | 1 | 0 | 2.335241  | 0.523051  | -2.958927 |
| 21 | 6 | 0 | 3.651121  | 0.828418  | -1.379575 |
| 22 | 8 | 0 | -0.861266 | 0.520126  | -1.902098 |
| 23 | 6 | 0 | -1.637828 | 0.615569  | -0.770681 |
| 24 | 6 | 0 | -1.614205 | 1.898678  | -0.115866 |
| 25 | 6 | 0 | -1.530715 | 4.452615  | 1.112195  |
| 26 | 6 | 0 | -2.660184 | 2.342340  | 0.736154  |
| 27 | 6 | 0 | -0.540056 | 2.796488  | -0.353292 |
| 28 | 6 | 0 | -0.502224 | 4.043675  | 0.255319  |
| 29 | 6 | 0 | -2.610359 | 3.592312  | 1.340291  |
| 30 | 1 | 0 | -3.527406 | 1.710323  | 0.892886  |
| 31 | 1 | 0 | 0.260751  | 2.485227  | -1.013401 |
| 32 | 1 | 0 | 0.338695  | 4.705765  | 0.063355  |
| 33 | 1 | 0 | -3.429006 | 3.906679  | 1.983092  |
| 34 | 1 | 0 | -1.496535 | 5.429586  | 1.586588  |
| 35 | 6 | 0 | -2.509280 | -0.502181 | -0.448149 |
| 36 | 6 | 0 | -4.182355 | -2.716082 | 0.124952  |
| 37 | 6 | 0 | -2.894673 | -0.806424 | 0.880228  |
| 38 | 6 | 0 | -2.978874 | -1.355533 | -1.476467 |
| 39 | 6 | 0 | -3.802978 | -2.438636 | -1.192347 |
| 40 | 6 | 0 | -3.719830 | -1.892696 | 1.156446  |
| 41 | 1 | 0 | -2.515827 | -0.198617 | 1.695490  |
| 42 | 1 | 0 | -2.708769 | -1.131545 | -2.503859 |
| 43 | 1 | 0 | -4.160518 | -3.067016 | -2.004395 |
| 44 | 1 | 0 | -3.994937 | -2.105917 | 2.186440  |
| 45 | 1 | 0 | -4.825829 | -3.563352 | 0.344928  |
| 46 | 1 | 0 | 4.383278  | 1.302362  | -2.030625 |
| 47 | 8 | 0 | 4.011395  | 0.700530  | -0.074293 |
| 48 | 6 | 0 | 5.139844  | 1.472920  | 0.315160  |
| 49 | 1 | 0 | 4.923795  | 2.547260  | 0.251756  |
| 50 | 1 | 0 | 6.013615  | 1.242712  | -0.310356 |
| 51 | 1 | 0 | 5.358121  | 1.207643  | 1.351127  |

-----

Structure of optimized structures T-DR1-anti-cis

Zero-point correction= 0.418064 (Hartree/Particle)  
 Thermal correction to Energy= 0.445949  
 Thermal correction to Enthalpy= 0.446893  
 Thermal correction to Gibbs Free Energy= 0.354674  
 Sum of electronic and zero-point Energies= -1330.604102  
 Sum of electronic and thermal Energies= -1330.576217  
 Sum of electronic and thermal Enthalpies= -1330.575273  
 Sum of electronic and thermal Free Energies= -1330.667492

-----

| Center<br>Number | Atomic<br>Number | Atomic<br>Type | Coordinates (Angstroms) |           |           |
|------------------|------------------|----------------|-------------------------|-----------|-----------|
|                  |                  |                | X                       | Y         | Z         |
| 1                | 6                | 0              | -0.546064               | -0.324205 | -0.606928 |
| 2                | 1                | 0              | -0.632743               | 0.688924  | -1.013961 |

-----

|    |    |   |           |           |           |
|----|----|---|-----------|-----------|-----------|
| 3  | 1  | 0 | -0.420070 | -1.006410 | -1.453762 |
| 4  | 6  | 0 | -1.820459 | -0.672451 | 0.197312  |
| 5  | 8  | 0 | -3.033015 | -0.295050 | -0.418747 |
| 6  | 14 | 0 | -3.806511 | 1.085068  | 0.147765  |
| 7  | 6  | 0 | -5.404471 | 1.363638  | -0.836221 |
| 8  | 1  | 0 | -6.068427 | 0.501405  | -0.730687 |
| 9  | 1  | 0 | -5.175662 | 1.501344  | -1.897309 |
| 10 | 1  | 0 | -5.925904 | 2.253664  | -0.471883 |
| 11 | 6  | 0 | -2.757410 | 2.638163  | -0.038857 |
| 12 | 1  | 0 | -1.843204 | 2.558802  | 0.556690  |
| 13 | 1  | 0 | -3.311568 | 3.518426  | 0.297826  |
| 14 | 1  | 0 | -2.475335 | 2.785781  | -1.084862 |
| 15 | 6  | 0 | -4.301251 | 0.908949  | 1.962922  |
| 16 | 1  | 0 | -3.413547 | 0.788700  | 2.590089  |
| 17 | 1  | 0 | -4.944477 | 0.035236  | 2.098531  |
| 18 | 1  | 0 | -4.845485 | 1.797219  | 2.298415  |
| 19 | 6  | 0 | -1.787425 | -1.962527 | 0.927193  |
| 20 | 1  | 0 | -1.240836 | -1.874506 | 1.867312  |
| 21 | 6  | 0 | -2.271635 | -3.185498 | 0.662543  |
| 22 | 8  | 0 | 0.640610  | -0.386283 | 0.213999  |
| 23 | 6  | 0 | 1.866467  | 0.012651  | -0.460697 |
| 24 | 6  | 0 | 2.152778  | 1.469862  | -0.300572 |
| 25 | 6  | 0 | 2.735950  | 4.205459  | -0.080393 |
| 26 | 6  | 0 | 2.809144  | 2.138474  | -1.330012 |
| 27 | 6  | 0 | 1.781157  | 2.182662  | 0.836533  |
| 28 | 6  | 0 | 2.069070  | 3.545371  | 0.952332  |
| 29 | 6  | 0 | 3.106054  | 3.499683  | -1.226573 |
| 30 | 1  | 0 | 3.070131  | 1.561182  | -2.209095 |
| 31 | 1  | 0 | 1.241680  | 1.649365  | 1.611687  |
| 32 | 1  | 0 | 1.755260  | 4.076513  | 1.841762  |
| 33 | 1  | 0 | 3.613573  | 3.995382  | -2.043893 |
| 34 | 1  | 0 | 2.954463  | 5.262546  | 0.002059  |
| 35 | 6  | 0 | 2.971989  | -0.908704 | -0.074358 |
| 36 | 6  | 0 | 5.070822  | -2.652299 | 0.557200  |
| 37 | 6  | 0 | 3.640007  | -1.599417 | -1.080243 |
| 38 | 6  | 0 | 3.350530  | -1.101611 | 1.249816  |
| 39 | 6  | 0 | 4.397917  | -1.968662 | 1.572198  |
| 40 | 6  | 0 | 4.688580  | -2.469389 | -0.772662 |
| 41 | 1  | 0 | 3.302739  | -1.440289 | -2.097630 |
| 42 | 1  | 0 | 2.795141  | -0.569299 | 2.013235  |
| 43 | 1  | 0 | 4.668782  | -2.108957 | 2.611287  |
| 44 | 1  | 0 | 5.188618  | -3.000948 | -1.572422 |
| 45 | 1  | 0 | 5.878532  | -3.332324 | 0.803119  |
| 46 | 1  | 0 | -2.131035 | -3.963484 | 1.402134  |
| 47 | 8  | 0 | -2.920855 | -3.745039 | -0.401718 |
| 48 | 6  | 0 | -2.961947 | -2.963705 | -1.586407 |
| 49 | 1  | 0 | -1.991247 | -2.540076 | -1.846314 |
| 50 | 1  | 0 | -3.754984 | -2.217835 | -1.529159 |
| 51 | 1  | 0 | -3.235981 | -3.638990 | -2.404919 |

---



## Structure of optimized structures T-DR3-gauche-cis

Zero-point correction = 0.417392 (Hartree/Particle)  
Thermal correction to Energy = 0.444784  
Thermal correction to Enthalpy = 0.445728  
Thermal correction to Gibbs Free Energy = 0.355511  
Sum of electronic and zero-point Energies = -1330.595087  
Sum of electronic and thermal Energies = -1330.567695  
Sum of electronic and thermal Enthalpies = -1330.566751  
Sum of electronic and thermal Free Energies = -1330.656968

| Center<br>Number | Atomic<br>Number | Atomic<br>Type | Coordinates (Angstroms) |           |           |
|------------------|------------------|----------------|-------------------------|-----------|-----------|
|                  |                  |                | X                       | Y         | Z         |
| 1                | 6                | 0              | 1.523080                | -0.390309 | -0.109331 |
| 2                | 8                | 0              | 2.367627                | 0.501447  | -0.744855 |
| 3                | 14               | 0              | 4.051052                | 0.566890  | -0.635873 |
| 4                | 6                | 0              | 4.818284                | -1.030113 | -1.284413 |
| 5                | 1                | 0              | 4.474162                | -1.903959 | -0.719181 |
| 6                | 1                | 0              | 5.912246                | -0.994944 | -1.205584 |
| 7                | 1                | 0              | 4.566134                | -1.195262 | -2.338455 |
| 8                | 6                | 0              | 4.568072                | 0.839606  | 1.158895  |
| 9                | 1                | 0              | 4.206482                | 0.035104  | 1.810103  |
| 10               | 1                | 0              | 4.174390                | 1.785199  | 1.549536  |
| 11               | 1                | 0              | 5.661083                | 0.870934  | 1.249654  |
| 12               | 8                | 0              | -1.380671               | -0.104065 | 1.824671  |
| 13               | 6                | 0              | -1.917513               | 0.131889  | 0.570447  |
| 14               | 6                | 0              | -2.251009               | -1.012644 | -0.265744 |
| 15               | 6                | 0              | -2.933287               | -3.247149 | -1.859213 |
| 16               | 6                | 0              | -2.222061               | -0.940222 | -1.678252 |
| 17               | 6                | 0              | -2.610231               | -2.247204 | 0.323263  |
| 18               | 6                | 0              | -2.950868               | -3.341451 | -0.463738 |
| 19               | 6                | 0              | -2.560046               | -2.041553 | -2.459194 |
| 20               | 1                | 0              | -1.894000               | -0.023972 | -2.157835 |
| 21               | 1                | 0              | -2.619430               | -2.326235 | 1.403580  |
| 22               | 1                | 0              | -3.237514               | -4.275132 | 0.013806  |
| 23               | 1                | 0              | -2.518035               | -1.962113 | -3.542567 |
| 24               | 1                | 0              | -3.199017               | -4.105201 | -2.470815 |
| 25               | 6                | 0              | -2.265188               | 1.505398  | 0.311858  |
| 26               | 6                | 0              | -2.937896               | 4.228404  | -0.131434 |
| 27               | 6                | 0              | -3.179323               | 1.886599  | -0.707646 |
| 28               | 6                | 0              | -1.734291               | 2.543178  | 1.124426  |
| 29               | 6                | 0              | -2.060694               | 3.873431  | 0.899449  |
| 30               | 6                | 0              | -3.498596               | 3.220775  | -0.923961 |
| 31               | 1                | 0              | -3.660663               | 1.122654  | -1.307137 |
| 32               | 1                | 0              | -1.065921               | 2.280305  | 1.935493  |
| 33               | 1                | 0              | -1.629812               | 4.643645  | 1.534514  |
| 34               | 1                | 0              | -4.204767               | 3.477812  | -1.709588 |
| 35               | 1                | 0              | -3.190888               | 5.270580  | -0.305188 |
| 36               | 8                | 0              | -0.082979               | -2.017118 | 1.902809  |
| 37               | 6                | 0              | 0.978875                | -2.654111 | 2.595322  |

|    |   |   |           |           |           |
|----|---|---|-----------|-----------|-----------|
| 38 | 1 | 0 | 1.950469  | -2.467234 | 2.118611  |
| 39 | 1 | 0 | 0.768341  | -3.725657 | 2.569813  |
| 40 | 1 | 0 | 1.025226  | -2.321744 | 3.643821  |
| 41 | 6 | 0 | 1.288421  | -1.610276 | -0.727230 |
| 42 | 1 | 0 | 1.761074  | -1.832262 | -1.676807 |
| 43 | 1 | 0 | 0.596576  | -2.321651 | -0.299981 |
| 44 | 6 | 0 | -0.046582 | -0.609638 | 1.982277  |
| 45 | 1 | 0 | 0.184209  | -0.328856 | 3.022170  |
| 46 | 6 | 0 | 0.950805  | 0.067030  | 1.082033  |
| 47 | 1 | 0 | 1.213101  | 1.077748  | 1.380765  |
| 48 | 6 | 0 | 4.524982  | 2.031982  | -1.711616 |
| 49 | 1 | 0 | 5.611452  | 2.181872  | -1.721925 |
| 50 | 1 | 0 | 4.197220  | 1.882714  | -2.746605 |
| 51 | 1 | 0 | 4.061731  | 2.955347  | -1.346162 |

### Structure of optimized structures T-DR3-anti-cis

Zero-point correction = 0.417330 (Hartree/Particle)  
 Thermal correction to Energy = 0.444833  
 Thermal correction to Enthalpy = 0.445777  
 Thermal correction to Gibbs Free Energy = 0.354438  
 Sum of electronic and zero-point Energies = -1330.601788  
 Sum of electronic and thermal Energies = -1330.574284  
 Sum of electronic and thermal Enthalpies = -1330.573340  
 Sum of electronic and thermal Free Energies = -1330.664680

| Center<br>Number | Atomic<br>Number | Atomic<br>Type | Coordinates (Angstroms) |           |           |
|------------------|------------------|----------------|-------------------------|-----------|-----------|
|                  |                  |                | X                       | Y         | Z         |
| 1                | 6                | 0              | 2.371129                | -0.622961 | -0.347060 |
| 2                | 8                | 0              | 3.514119                | -0.197896 | -0.996472 |
| 3                | 14               | 0              | 5.033935                | 0.075702  | -0.311962 |
| 4                | 6                | 0              | 5.709642                | -1.506571 | 0.462090  |
| 5                | 1                | 0              | 5.051470                | -1.886801 | 1.251760  |
| 6                | 1                | 0              | 6.695285                | -1.327699 | 0.910188  |
| 7                | 1                | 0              | 5.824391                | -2.299316 | -0.286410 |
| 8                | 6                | 0              | 4.907863                | 1.427953  | 0.998441  |
| 9                | 1                | 0              | 4.205895                | 1.154307  | 1.795026  |
| 10               | 1                | 0              | 4.563994                | 2.373584  | 0.563354  |
| 11               | 1                | 0              | 5.882745                | 1.611682  | 1.467109  |
| 12               | 8                | 0              | -0.794142               | -0.215875 | -0.441876 |
| 13               | 6                | 0              | -2.144862               | 0.036481  | -0.265714 |
| 14               | 6                | 0              | -2.553272               | 1.426978  | -0.184900 |
| 15               | 6                | 0              | -3.283859               | 4.158178  | -0.023535 |
| 16               | 6                | 0              | -3.711277               | 1.836051  | 0.520584  |
| 17               | 6                | 0              | -1.765042               | 2.436271  | -0.792204 |
| 18               | 6                | 0              | -2.129324               | 3.775620  | -0.713967 |
| 19               | 6                | 0              | -4.067794               | 3.178395  | 0.593899  |
| 20               | 1                | 0              | -4.308790               | 1.092852  | 1.038163  |
| 21               | 1                | 0              | -0.881712               | 2.143625  | -1.351119 |
| 22               | 1                | 0              | -1.514375               | 4.527062  | -1.202905 |

|    |   |   |           |           |           |
|----|---|---|-----------|-----------|-----------|
| 23 | 1 | 0 | -4.957046 | 3.464953  | 1.149654  |
| 24 | 1 | 0 | -3.566280 | 5.205534  | 0.036550  |
| 25 | 6 | 0 | -3.005042 | -1.116435 | -0.325910 |
| 26 | 6 | 0 | -4.649702 | -3.418683 | -0.474331 |
| 27 | 6 | 0 | -4.380885 | -1.018905 | -0.663613 |
| 28 | 6 | 0 | -2.478004 | -2.413694 | -0.093248 |
| 29 | 6 | 0 | -3.290413 | -3.537486 | -0.162747 |
| 30 | 6 | 0 | -5.183632 | -2.150850 | -0.728733 |
| 31 | 1 | 0 | -4.804627 | -0.051289 | -0.909049 |
| 32 | 1 | 0 | -1.429357 | -2.509854 | 0.158615  |
| 33 | 1 | 0 | -2.862443 | -4.518102 | 0.030445  |
| 34 | 1 | 0 | -6.232009 | -2.046382 | -0.996873 |
| 35 | 1 | 0 | -5.280926 | -4.301417 | -0.528101 |
| 36 | 8 | 0 | -0.000500 | -0.816920 | 1.596880  |
| 37 | 6 | 0 | 0.566176  | -0.442617 | 2.841502  |
| 38 | 1 | 0 | 1.654733  | -0.308933 | 2.772817  |
| 39 | 1 | 0 | 0.348364  | -1.254102 | 3.539575  |
| 40 | 1 | 0 | 0.118108  | 0.487927  | 3.222392  |
| 41 | 6 | 0 | 2.195030  | -1.984391 | -0.154345 |
| 42 | 1 | 0 | 2.936660  | -2.685429 | -0.518726 |
| 43 | 1 | 0 | 1.307429  | -2.357924 | 0.336527  |
| 44 | 6 | 0 | 0.094083  | 0.185521  | 0.600041  |
| 45 | 1 | 0 | -0.250070 | 1.139206  | 1.027042  |
| 46 | 6 | 0 | 1.463447  | 0.377765  | 0.012190  |
| 47 | 1 | 0 | 1.727349  | 1.397093  | -0.253062 |
| 48 | 6 | 0 | 6.098194  | 0.625679  | -1.758917 |
| 49 | 1 | 0 | 7.125206  | 0.836745  | -1.436792 |
| 50 | 1 | 0 | 6.142081  | -0.150037 | -2.531753 |
| 51 | 1 | 0 | 5.698295  | 1.534629  | -2.222355 |

**Table S2. T-DR1-*trans* dihedral angle scan**

|                                                                 |             |
|-----------------------------------------------------------------|-------------|
| UB3LYP/6-31G(d) level of theory in the GAUSSIAN 09              |             |
| Scan of Total Energy                                            |             |
| X-Axis: Scan Coordinate Dihedral Angle, $\theta$ ( $^{\circ}$ ) |             |
| Y-Axis: Total Energy (kJ/mol)                                   |             |
| <b>X</b>                                                        | <b>Y</b>    |
| 0                                                               | 22.72934733 |
| 10                                                              | 24.19710685 |
| 20                                                              | 24.66087517 |
| 30                                                              | 24.03246174 |
| 40                                                              | 23.06073794 |
| 50                                                              | 21.7296882  |

|     |             |
|-----|-------------|
| 60  | 20.2919644  |
| 70  | 16.83583497 |
| 80  | 14.89209855 |
| 90  | 13.66354834 |
| 100 | 11.54526868 |
| 110 | 8.13421908  |
| 120 | 5.004386785 |
| 130 | 2.377574035 |
| 140 | 0.78722992  |
| 150 | 0           |
| 160 | 0.218835425 |
| 170 | 0.73219944  |
| 180 | 1.67795705  |
| 190 | 3.323436666 |
| 240 | 6.588245915 |
| 250 | 6.994699571 |
| 260 | 7.74007902  |
| 270 | 8.729603715 |
| 280 | 8.81716414  |
| 290 | 7.59158074  |
| 300 | 7.47264559  |
| 310 | 7.921474815 |
| 320 | 9.754913975 |
| 330 | 12.53248294 |
| 340 | 15.24669858 |
| 350 | 17.7496665  |
| 360 | 20.40835282 |

**Table S3. T-DR3-*trans* dihedral angle scan**

| UB3LYP/6-31G(d) level of theory in the GAUSSIAN 09              |             |
|-----------------------------------------------------------------|-------------|
| Scan of Total Energy                                            |             |
| X-Axis: Scan Coordinate Dihedral Angle, $\theta$ ( $^{\circ}$ ) |             |
| Y-Axis: Total Energy (kJ/mol)                                   |             |
| X                                                               | Y           |
| 0                                                               | 42.60275452 |
| 10                                                              | 42.00863012 |
| 20                                                              | 41.35023349 |
| 30                                                              | 40.09676728 |
| 40                                                              | 38.88701564 |
| 50                                                              | 38.24130017 |

|     |             |
|-----|-------------|
| 60  | 37.61110141 |
| 70  | 38.32190302 |
| 80  | 39.88696357 |
| 90  | 41.81163886 |
| 100 | 43.21292071 |
| 110 | 43.29515138 |
| 120 | 42.15820486 |
| 130 | 38.94117971 |
| 140 | 34.24389766 |
| 150 | 29.31352372 |
| 160 | 24.4509927  |
| 170 | 20.32887893 |
| 180 | 17.55330535 |
| 190 | 16.052307   |
| 200 | 16.0066233  |
| 210 | 16.17686072 |
| 220 | 15.46259344 |
| 230 | 15.53201167 |
| 240 | 17.9972774  |
| 250 | 22.52894291 |
| 260 | 24.50547182 |
| 270 | 25.73102897 |
| 280 | 27.47732778 |
| 290 | 29.79199484 |
| 300 | 32.28871406 |
| 310 | 34.79777314 |
| 320 | 37.54567395 |
| 330 | 40.06421108 |
| 340 | 41.40662923 |
| 350 | 41.8029222  |
| 360 | 42.09246234 |

**Table S4. T-DR1-*cis* dihedral angle scan**

|                                                                 |             |
|-----------------------------------------------------------------|-------------|
| UB3LYP/6-31G(d) level of theory in the GAUSSIAN 09              |             |
| Scan of Total Energy                                            |             |
| X-Axis: Scan Coordinate Dihedral Angle, $\theta$ ( $^{\circ}$ ) |             |
| Y-Axis: Total Energy (kJ/mol)                                   |             |
| <b>X</b>                                                        | <b>Y</b>    |
| 0                                                               | 19.83707027 |
| 10                                                              | 20.67951446 |

|     |             |
|-----|-------------|
| 20  | 20.40864162 |
| 30  | 19.28083184 |
| 40  | 17.71054655 |
| 50  | 15.7535251  |
| 60  | 13.92008594 |
| 70  | 12.5057816  |
| 80  | 11.97099351 |
| 90  | 11.44691745 |
| 100 | 10.51160933 |
| 110 | 9.591607875 |
| 120 | 8.77961949  |
| 130 | 7.14120247  |
| 140 | 5.37817922  |
| 150 | 4.33538313  |
| 160 | 3.7324108   |
| 170 | 3.10034793  |
| 180 | 2.356412505 |
| 190 | 1.684862115 |
| 200 | 0.64224981  |
| 210 | 0.15275159  |
| 220 | 0           |
| 230 | 0.129305875 |
| 240 | 0.888968045 |
| 250 | 1.62334665  |
| 260 | 2.62114167  |
| 270 | 2.53759826  |
| 280 | 2.472092035 |
| 290 | 2.68714674  |
| 300 | 3.405352265 |
| 310 | 5.50189278  |
| 320 | 8.44702115  |
| 330 | 11.90288804 |
| 340 | 15.28988806 |
| 350 | 17.90845674 |
| 360 | 19.83709653 |

**Table S5. T-DR3-*cis* dihedral angle scan**

| UB3LYP/6-31G(d) level of theory in the GAUSSIAN 09              |          |
|-----------------------------------------------------------------|----------|
| Scan of Total Energy                                            |          |
| X-Axis: Scan Coordinate Dihedral Angle, $\theta$ ( $^{\circ}$ ) |          |
| Y-Axis: Total Energy (kJ/mol)                                   |          |
| X                                                               | Y        |
| 0                                                               | 30.60832 |
| 10                                                              | 28.65342 |
| 20                                                              | 27.50025 |
| 30                                                              | 27.37115 |
| 40                                                              | 28.35816 |
| 50                                                              | 30.37522 |
| 60                                                              | 32.618   |
| 80                                                              | 35.02317 |
| 90                                                              | 36.49962 |
| 100                                                             | 37.17797 |
| 110                                                             | 36.64358 |
| 120                                                             | 34.43779 |
| 130                                                             | 30.75639 |
| 140                                                             | 26.45233 |
| 150                                                             | 21.71186 |
| 160                                                             | 17.36574 |
| 170                                                             | 14.07935 |
| 180                                                             | 11.74024 |
| 190                                                             | 10.50271 |
| 200                                                             | 9.839429 |
| 210                                                             | 10.04143 |
| 220                                                             | 11.24    |
| 230                                                             | 13.66877 |
| 240                                                             | 16.71511 |
| 250                                                             | 20.27469 |
| 260                                                             | 23.32321 |
| 270                                                             | 26.27262 |
| 280                                                             | 29.26343 |
| 290                                                             | 31.94824 |
| 300                                                             | 34.41996 |
| 310                                                             | 36.1989  |
| 320                                                             | 37.15337 |
| 330                                                             | 37.19777 |
| 340                                                             | 36.33647 |
| 350                                                             | 34.54819 |

**Table S6. T-DR1-*trans* bond formation scan**

| UB3LYP/6-31G(d) level of theory in the GAUSSIAN 09 |             |
|----------------------------------------------------|-------------|
| Scan of Total Energy                               |             |
| X-Axis: Scan Coordinate Distance, r (pm)           |             |
| Y-Axis: Total Energy (kJ/mol)                      |             |
| X                                                  | Y           |
| 431.66                                             | 94.83911965 |
| 421.66                                             | 94.73457487 |
| 411.66                                             | 94.68964206 |
| 401.66                                             | 94.48555407 |
| 391.66                                             | 94.10808331 |
| 381.66                                             | 93.69672522 |
| 371.66                                             | 93.25396878 |
| 361.66                                             | 92.79040787 |
| 351.66                                             | 92.31640798 |
| 341.66                                             | 91.84267851 |
| 331.66                                             | 91.36519721 |
| 321.66                                             | 90.86649923 |
| 311.66                                             | 90.36345081 |
| 301.66                                             | 89.82880186 |
| 291.66                                             | 89.21917127 |
| 281.66                                             | 88.61108184 |
| 271.66                                             | 88.1197799  |
| 261.66                                             | 87.78723407 |
| 251.66                                             | 87.57450031 |
| 241.66                                             | 87.41321584 |
| 231.66                                             | 87.26696761 |
| 221.66                                             | 86.78085104 |
| 211.66                                             | 85.18995294 |
| 201.66                                             | 81.03631742 |
| 191.66                                             | 72.54330539 |
| 181.66                                             | 59.15795504 |
| 171.66                                             | 41.80263602 |
| 161.66                                             | 22.72626499 |
| 151.66                                             | 6.671765696 |
| 141.66                                             | 2.372160254 |



**Table S7. T-DR3-trans** bond formation scan

| UB3LYP/6-31G(d) level of theory in the GAUSSIAN 09 |             |
|----------------------------------------------------|-------------|
| Scan of Total Energy                               |             |
| X-Axis: Scan Coordinate Distance, r (pm)           |             |
| Y-Axis: Total Energy (kJ/mol)                      |             |
| X                                                  | Y           |
| 436.00                                             | 91.71555968 |
| 426.00                                             | 91.29974612 |
| 416.00                                             | 90.9935183  |
| 406.00                                             | 90.8121225  |
| 396.00                                             | 90.74536654 |
| 386.00                                             | 90.76263708 |
| 376.00                                             | 90.84609385 |
| 366.00                                             | 91.04492296 |
| 356.00                                             | 91.0538024  |
| 346.00                                             | 91.31585093 |
| 336.00                                             | 91.71102807 |
| 326.00                                             | 92.26652085 |
| 316.00                                             | 93.05316004 |
| 306.00                                             | 94.11975103 |
| 296.00                                             | 92.19669306 |
| 286.00                                             | 90.16614448 |
| 276.00                                             | 89.12260275 |
| 266.00                                             | 88.23278142 |
| 256.00                                             | 87.59843699 |
| 246.00                                             | 87.2741326  |
| 236.00                                             | 87.20945079 |
| 226.00                                             | 87.12181685 |
| 216.00                                             | 86.18140475 |
| 206.00                                             | 82.67361598 |
| 196.00                                             | 67.60386297 |
| 186.00                                             | 60.45608625 |
| 176.00                                             | 48.51805853 |
| 166.00                                             | 33.84790137 |
| 156.00                                             | 19.10113737 |
| 146.00                                             | 0           |

**Table S8. T-DR1-*cis* bond formation scan**

| UB3LYP/6-31G(d) level of theory in the GAUSSIAN 09 |          |
|----------------------------------------------------|----------|
| Scan of Total Energy                               |          |
| X-Axis: Scan Coordinate Distance, r (pm)           |          |
| Y-Axis: Total Energy (kJ/mol)                      |          |
| X                                                  | Y        |
| 441.66                                             | 91.80128 |
| 431.66                                             | 91.62197 |
| 421.66                                             | 91.47163 |
| 411.66                                             | 91.33062 |
| 401.66                                             | 91.01882 |
| 391.66                                             | 90.61638 |
| 381.66                                             | 90.17145 |
| 371.66                                             | 89.71888 |
| 361.66                                             | 89.255   |
| 351.66                                             | 88.77541 |
| 341.66                                             | 88.26299 |
| 331.66                                             | 87.69377 |
| 321.66                                             | 87.10895 |
| 311.66                                             | 86.52237 |
| 301.66                                             | 85.93275 |
| 291.66                                             | 85.32465 |
| 281.66                                             | 84.71787 |
| 271.66                                             | 84.21895 |
| 261.66                                             | 83.80736 |
| 251.66                                             | 83.53622 |
| 241.66                                             | 83.25738 |
| 231.66                                             | 82.95645 |
| 221.66                                             | 82.28549 |
| 211.66                                             | 80.38282 |
| 201.66                                             | 75.77755 |
| 191.66                                             | 66.84509 |
| 181.66                                             | 53.14716 |
| 171.66                                             | 35.46947 |
| 161.66                                             | 16.12274 |
| 151.66                                             | 0        |

**Table S9. T-DR3-*cis* bond formation scan**

| UB3LYP/6-31G(d) level of theory in the GAUSSIAN 09 |          |
|----------------------------------------------------|----------|
| Scan of Total Energy                               |          |
| X-Axis: Scan Coordinate Distance, r (pm)           |          |
| Y-Axis: Total Energy (kJ/mol)                      |          |
| X                                                  | Y        |
| 445.99                                             | 88.20608 |
| 435.99                                             | 88.35504 |
| 425.99                                             | 88.48308 |
| 415.99                                             | 88.58576 |
| 405.99                                             | 88.9208  |
| 395.99                                             | 87.37095 |
| 385.99                                             | 87.21074 |
| 375.99                                             | 87.06594 |
| 365.99                                             | 86.91682 |
| 355.99                                             | 86.73154 |
| 345.99                                             | 86.48192 |
| 335.99                                             | 86.05296 |
| 325.99                                             | 85.51741 |
| 315.99                                             | 84.83917 |
| 305.99                                             | 83.66277 |
| 295.99                                             | 82.47867 |
| 285.99                                             | 81.30181 |
| 275.99                                             | 80.21986 |
| 265.99                                             | 79.34357 |
| 255.99                                             | 78.82934 |
| 245.99                                             | 78.82692 |
| 235.99                                             | 79.29429 |
| 225.99                                             | 79.87972 |
| 215.99                                             | 79.6892  |
| 205.99                                             | 76.87486 |
| 195.99                                             | 61.36453 |
| 185.99                                             | 55.92532 |
| 175.99                                             | 45.39037 |
| 165.99                                             | 31.67176 |
| 155.99                                             | 17.63581 |
